# Supplementary material for: The Roles of Protein Structure, Taxon Sampling, and Model Complexity in Phylogenomics: A Case Study Focused on Early Animal Divergences
Source: Preprints.org preprint supplement (doi:10.20944/preprints202101.0390.v1), 2021-01-19
Supplement: Supplementary file 1 [file Supplementary_fileS2.xlsx]

## Sheet: Model fit - RSA vs SS
Dataset	lnL	RSA vs SS lnL	RSA vs SS delta lnL	K	Total sites	n	RSA vs SS AICc	RSA vs SS delta AICc	Treelength	Relative Rate	alpha
Exposed	-9.64311e+06	-1.75269e+07	0	800	161897	356014	3.50555e+07	0	29.987	1.6652	0.815543
Buried	-7.88382e+06				194117				18.0081	1	0.713171
Helix	-8.286e+06	-1.76119e+07	84985.1	1200	161117	356014	3.52262e+07	170780	26.6461	1.21451	0.74075
Sheet	-2.85989e+06				60563				21.9398	1	0.749504
Coil	-6.46602e+06				134334				23.2011	1.05749	0.670697
AA freq	Exposed	Buried	Helix	Sheet	Coil
pi(A)	0.07152	0.09474	0.097337	0.060219	0.062865
pi(R)	0.081262	0.030139	0.059267	0.040464	0.049677
pi(N)	0.054907	0.019962	0.028302	0.01872	0.057032
pi(D)	0.087977	0.019849	0.040401	0.021694	0.071901
pi(C)	0.005869	0.033111	0.014085	0.029796	0.015338
pi(Q)	0.066555	0.019846	0.050727	0.022701	0.038703
pi(E)	0.127792	0.020194	0.082067	0.034606	0.063858
pi(G)	0.049916	0.047677	0.02258	0.028284	0.087574
pi(H)	0.026622	0.022156	0.022497	0.020677	0.027775
pi(I)	0.01595	0.08989	0.057181	0.106645	0.031778
pi(L)	0.037324	0.179189	0.149899	0.132082	0.075292
pi(K)	0.132985	0.019211	0.076794	0.042073	0.075641
pi(M)	0.013039	0.034013	0.031139	0.025989	0.018857
pi(F)	0.01125	0.069345	0.04145	0.067164	0.034865
pi(P)	0.031585	0.01838	0.011262	0.007443	0.049005
pi(S)	0.080403	0.05659	0.059122	0.053529	0.090256
pi(T)	0.057393	0.0476	0.044834	0.059591	0.062348
pi(W)	0.00373	0.017639	0.011537	0.018254	0.008902
pi(Y)	0.013168	0.045977	0.031349	0.041014	0.028755
pi(V)	0.030753	0.114491	0.068171	0.169055	0.049578
hydrophobic	0.131083	0.583655	0.404811	0.589999	0.263365
polar	0.868917	0.416344	0.59519	0.410001	0.736635
helix	0.673361	0.437143	0.615933	0.398548	0.513826
sheet	0.245138	0.496799	0.350226	0.565725	0.349595
coil	0.081501	0.066057	0.033842	0.035727	0.136579

## Sheet: SD symmetry test
Dataset	T1	T2	T3	SD sites	Total sites		prop T1	prop T2	prop T3	prop T1/T3		Exp Sym	chi-sq Sym	P(Sym)
Exposed	274	1005	141	1420	161897		0.192958	0.707746	0.0992958	0.292254		207.5	42.6241	6.63371e-11
Buried	269	1075	281	1625	194117		0.165538	0.661538	0.172923	0.338462		275	0.261818	0.608874
Helix	248	894	148	1290	161117		0.192248	0.693023	0.114729	0.306977		198	25.2525	5.02937e-07
Sheet	64	368	82	514	60563		0.124514	0.715953	0.159533	0.284047		73	2.21918	0.136306
Coil	211	812	171	1194	134334		0.176717	0.680067	0.143216	0.319933		191	4.18848	0.0406995
