# Supplementary material for: The Roles of Protein Structure, Taxon Sampling, and Model Complexity in Phylogenomics: A Case Study Focused on Early Animal Divergences
Source: Preprints.org preprint supplement (doi:10.20944/preprints202101.0390.v1), 2021-01-19
Supplement: Supplementary file 2 [file supplementary]

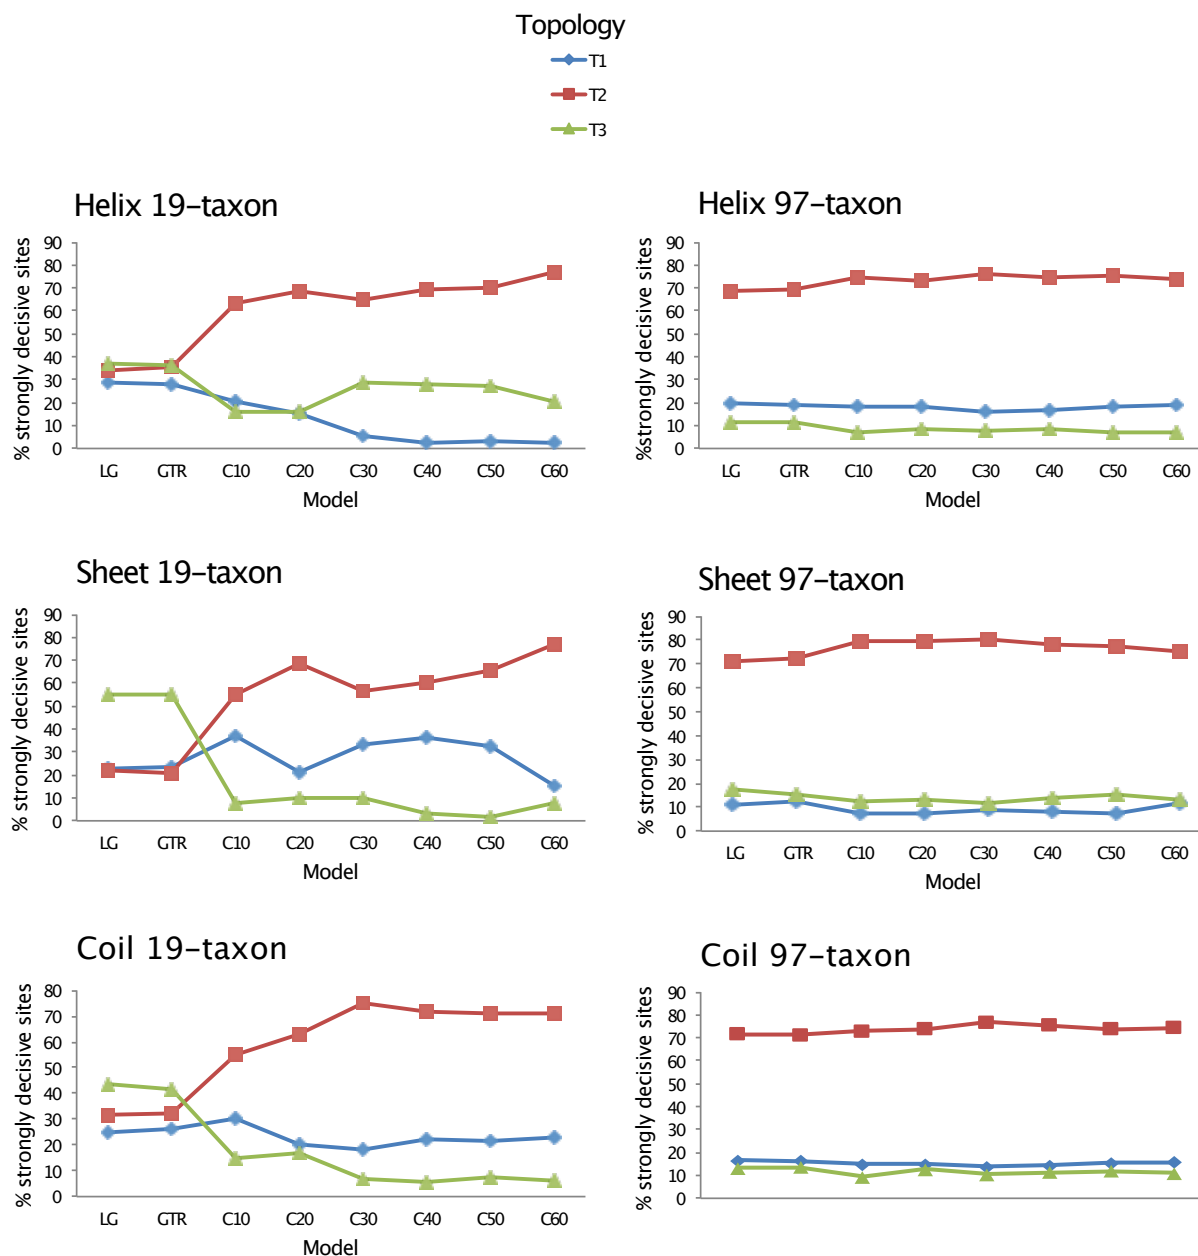

**Figure S2.** The proportions of strongly decisive sites supporting each topology are stable with respect to model complexity when a rich taxon sample is analyzed. Three 25,000 site datasets corresponding to the SS data subsets were chosen to explore the impact of increasing model complexity and adding taxa. The results of analyzing sparse taxon samples (left) were unstable, shifting from T3 to T2 as model complexity was increased. The results of analyses using the 97-taxon dataset were robust to changes in model complexity. Results for the RSA subsets are presented in the main text as Figure 4.
