# Supplementary material for: The Roles of Protein Structure, Taxon Sampling, and Model Complexity in Phylogenomics: A Case Study Focused on Early Animal Divergences
Source: Preprints.org preprint supplement (doi:10.20944/preprints202101.0390.v1), 2021-01-19
Supplement: Supplementary file 2 [file Supplementary_fileS3.xlsx]

## Sheet: AICc scores
19 taxon-set		AICc scores
	C10	C20	C30	C40	C50	C60	GTR	LG
BUR1	615237	597596	587967	582403	578819	575140	691600	695638
BUR2	613578	596312	586550	581230	577682	574010	690620	694536
BUR3	610448	593285	583357	578061	574494	570790	687208	691309
BUR4	615944	598462	588507	583264	579751	576011	693278	697469
BUR5	614364	596936	587110	581868	578164	574435	690935	694763
Average	613914	596518	586698	581365	577782	574077	690728	694743
EXP1	857653	827839	821009	816089	812720	808493	931074	940496
EXP2	860393	830364	823537	818659	815386	811172	934221	943081
EXP3	857504	827638	820840	815928	812616	808359	930577	939828
EXP4	856134	826663	819810	814883	811648	807473	928856	938143
EXP5	855540	825683	818959	813917	810522	806378	928819	937889
Average	857445	827638	820831	815895	812579	808375	930709	939887
97- taxon set		AICc scores
	C10	C20	C30	C40	C50	C60	GTR	LG
BUR1	1.90971e+06	1.87503e+06	1.8576e+06	1.84639e+06	1.83984e+06	1.83386e+06	2.03382e+06	2.04731e+06
BUR2	1.91047e+06	1.87645e+06	1.85909e+06	1.84822e+06	1.84168e+06	1.83584e+06	2.03456e+06	2.0472e+06
BUR3	1.90195e+06	1.86784e+06	1.85017e+06	1.83928e+06	1.83286e+06	1.82662e+06	2.02575e+06	2.03883e+06
BUR4	1.90333e+06	1.86864e+06	1.85112e+06	1.84068e+06	1.83429e+06	1.82802e+06	2.02703e+06	2.0407e+06
BUR5	1.90401e+06	1.86982e+06	1.85264e+06	1.84194e+06	1.83526e+06	1.82917e+06	2.02707e+06	2.03969e+06
Average	1.90589e+06	1.87156e+06	1.85412e+06	1.8433e+06	1.83679e+06	1.8307e+06	2.02965e+06	2.04275e+06
EXP1	2.86271e+06	2.80886e+06	2.79292e+06	2.78099e+06	2.77572e+06	2.76832e+06	2.97538e+06	3.00092e+06
EXP2	2.86916e+06	2.81478e+06	2.79895e+06	2.78685e+06	2.78146e+06	2.7742e+06	2.98356e+06	3.00796e+06
EXP3	2.85947e+06	2.80513e+06	2.7893e+06	2.77682e+06	2.77154e+06	2.76394e+06	2.9726e+06	2.99792e+06
EXP4	2.85744e+06	2.80371e+06	2.78762e+06	2.77554e+06	2.77005e+06	2.76274e+06	2.97021e+06	2.99479e+06
EXP5	2.84666e+06	2.79336e+06	2.77775e+06	2.76542e+06	2.7602e+06	2.75304e+06	2.96058e+06	2.98532e+06
Average	2.85909e+06	2.80517e+06	2.78931e+06	2.77712e+06	2.77179e+06	2.76445e+06	2.97247e+06	2.99738e+06
