# Supplementary material for: The Roles of Protein Structure, Taxon Sampling, and Model Complexity in Phylogenomics: A Case Study Focused on Early Animal Divergences
Source: Preprints.org preprint supplement (doi:10.20944/preprints202101.0390.v1), 2021-01-19
Supplement: Supplementary file 3 [file supplementary]

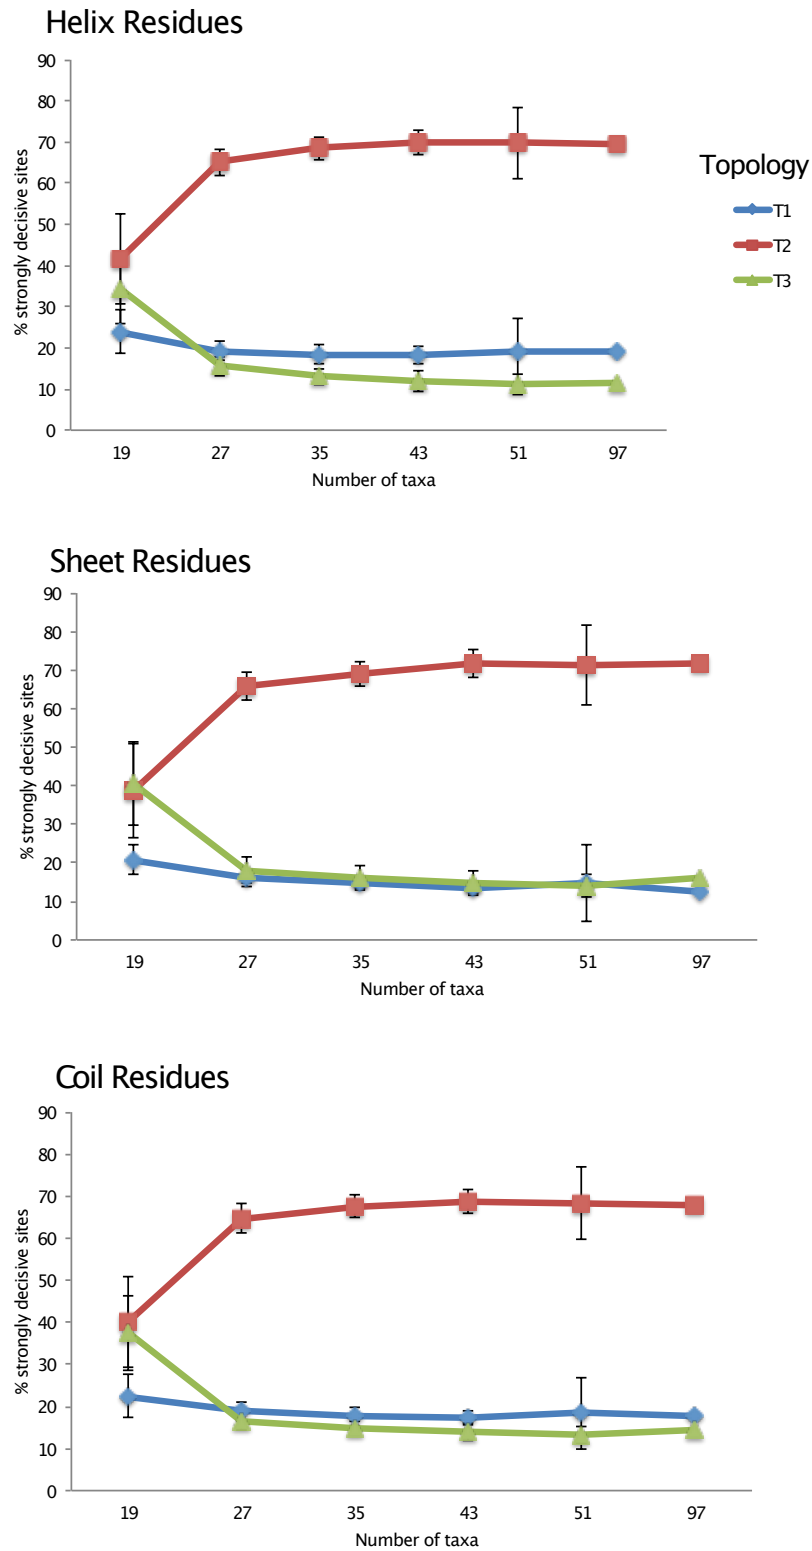

**Figure S1.** Taxon addition results in rapid convergence of the numbers of strongly decisive sites on the values found using the complete taxon set. The mean percentage of strongly decisive sites supporting each topology for the three SS subsets. Error bars indicate the standard deviation for the 40 taxon sampling replicates. Results for the RSA subsets are presented in the main text as Figure 3.
