# Supplementary material for: The Roles of Protein Structure, Taxon Sampling, and Model Complexity in Phylogenomics: A Case Study Focused on Early Animal Divergences
Source: Preprints.org preprint supplement (doi:10.20944/preprints202101.0390.v1), 2021-01-19
Supplement: Supplementary file 3 [file Supplementary_fileS4.xlsx]

## Sheet: SD sites per locus
Gene	T1	T2	T3	Conflict observed	Conflict possible	Informative sites	total strongly decisive sites
gene268	4	12	2	1	1	685	18
gene293	0	14	3	1	1	778	17		Genes with conflict:
gene130	3	11	0	1	1	453	14		457
gene285	1	10	2	1	1	559	13
gene407	0	9	4	1	1	644	13		Genes with ≥2 decisive sites:
gene278	4	7	1	1	1	529	12		761
gene311	3	9	0	1	1	763	12
gene403	0	12	0	0	1	563	12		Proportion with conflict:
gene318	4	7	0	1	1	617	11		0.600526
gene597	0	11	0	0	1	426	11
gene658	3	5	3	1	1	769	11
gene90	3	7	1	1	1	269	11
gene252	2	7	1	1	1	1108	10
gene270	3	7	0	1	1	668	10
gene396	1	8	1	1	1	401	10
gene473	0	7	3	1	1	631	10
gene500	2	5	3	1	1	810	10
gene55	2	7	1	1	1	638	10
gene681	2	8	0	1	1	387	10
gene771	0	9	1	1	1	291	10
gene1097	0	6	3	1	1	185	9
gene112	1	7	1	1	1	407	9
gene1137	0	9	0	0	1	157	9
gene40	1	7	1	1	1	939	9
gene400	0	9	0	0	1	218	9
gene461	3	3	3	1	1	219	9
gene1300	0	8	0	0	1	283	8
gene19	1	6	1	1	1	225	8
gene2	3	4	1	1	1	415	8
gene21	4	3	1	1	1	635	8
gene212	4	4	0	1	1	598	8
gene269	4	3	1	1	1	262	8
gene272	3	5	0	1	1	676	8
gene34	3	5	0	1	1	742	8
gene47	2	4	2	1	1	555	8
gene507	0	8	0	0	1	341	8
gene544	1	6	1	1	1	385	8
gene592	0	8	0	0	1	484	8
gene595	3	3	2	1	1	465	8
gene60	2	6	0	1	1	321	8
gene841	5	2	1	1	1	303	8
gene85	1	7	0	1	1	611	8
gene93	1	6	1	1	1	361	8
gene1048	0	6	1	1	1	287	7
gene110	3	4	0	1	1	280	7
gene1316	2	5	0	1	1	167	7
gene1523	3	4	0	1	1	239	7
gene154	2	3	2	1	1	638	7
gene243	1	4	2	1	1	938	7
gene258	3	4	0	1	1	555	7
gene286	2	5	0	1	1	466	7
gene294	1	5	1	1	1	536	7
gene353	3	3	1	1	1	541	7
gene39	1	3	3	1	1	480	7
gene394	1	6	0	1	1	444	7
gene409	1	5	1	1	1	580	7
gene574	0	7	0	0	1	379	7
gene608	1	4	2	1	1	345	7
gene621	3	2	2	1	1	352	7
gene624	1	5	1	1	1	152	7
gene74	0	6	1	1	1	419	7
gene884	1	4	2	1	1	451	7
gene926	5	1	1	1	1	308	7
gene102	0	6	0	0	1	289	6
gene113	0	6	0	0	1	550	6
gene120	1	4	1	1	1	251	6
gene1324	1	5	0	1	1	195	6
gene1327	2	4	0	1	1	280	6
gene141	1	5	0	1	1	288	6
gene1422	3	3	0	1	1	288	6
gene1453	0	4	2	1	1	408	6
gene152	3	2	1	1	1	362	6
gene166	2	4	0	1	1	299	6
gene176	3	3	0	1	1	883	6
gene185	3	3	0	1	1	688	6
gene192	1	4	1	1	1	218	6
gene240	0	6	0	0	1	284	6
gene254	1	4	1	1	1	228	6
gene274	1	5	0	1	1	363	6
gene282	0	6	0	0	1	264	6
gene297	1	4	1	1	1	389	6
gene32	0	6	0	0	1	369	6
gene337	2	3	1	1	1	578	6
gene349	0	6	0	0	1	426	6
gene36	0	5	1	1	1	265	6
gene361	2	3	1	1	1	207	6
gene387	0	5	1	1	1	325	6
gene393	0	5	1	1	1	355	6
gene398	1	5	0	1	1	250	6
gene413	0	3	3	1	1	212	6
gene426	1	5	0	1	1	213	6
gene466	2	2	2	1	1	378	6
gene504	0	5	1	1	1	519	6
gene512	0	2	4	1	1	392	6
gene513	0	5	1	1	1	249	6
gene520	1	5	0	1	1	306	6
gene53	2	4	0	1	1	220	6
gene532	2	2	2	1	1	560	6
gene58	2	3	1	1	1	198	6
gene584	0	3	3	1	1	163	6
gene609	1	5	0	1	1	550	6
gene631	2	3	1	1	1	356	6
gene639	1	4	1	1	1	155	6
gene656	1	3	2	1	1	260	6
gene661	2	4	0	1	1	215	6
gene72	1	3	2	1	1	219	6
gene772	1	5	0	1	1	413	6
gene794	0	6	0	0	1	99	6
gene817	1	5	0	1	1	335	6
gene832	0	4	2	1	1	298	6
gene837	0	4	2	1	1	279	6
gene953	0	6	0	0	1	391	6
gene957	0	6	0	0	1	424	6
gene1007	0	5	0	0	1	277	5
gene1020	2	3	0	1	1	181	5
gene1060	0	4	1	1	1	416	5
gene1284	0	5	0	0	1	122	5
gene1424	2	3	0	1	1	138	5
gene1566	0	5	0	0	1	193	5
gene1598	0	4	1	1	1	109	5
gene1609	1	1	3	1	1	218	5
gene1675	1	2	2	1	1	174	5
gene1701	1	3	1	1	1	155	5
gene229	0	4	1	1	1	228	5
gene262	1	4	0	1	1	234	5
gene263	0	4	1	1	1	194	5
gene28	0	4	1	1	1	290	5
gene296	0	5	0	0	1	127	5
gene317	1	1	3	1	1	638	5
gene343	2	3	0	1	1	520	5
gene423	2	1	2	1	1	287	5
gene434	2	3	0	1	1	399	5
gene440	0	3	2	1	1	381	5
gene456	0	5	0	0	1	154	5
gene494	0	4	1	1	1	107	5
gene499	1	3	1	1	1	80	5
gene501	0	5	0	0	1	303	5
gene540	1	4	0	1	1	366	5
gene571	0	4	1	1	1	106	5
gene575	1	4	0	1	1	215	5
gene59	2	3	0	1	1	167	5
gene596	0	2	3	1	1	443	5
gene613	1	3	1	1	1	451	5
gene62	2	3	0	1	1	479	5
gene633	2	2	1	1	1	245	5
gene655	3	2	0	1	1	144	5
gene679	1	1	3	1	1	420	5
gene690	2	2	1	1	1	210	5
gene732	1	2	2	1	1	108	5
gene752	2	2	1	1	1	322	5
gene763	2	3	0	1	1	496	5
gene783	0	4	1	1	1	147	5
gene842	1	2	2	1	1	132	5
gene847	0	4	1	1	1	304	5
gene893	0	5	0	0	1	251	5
gene9	1	4	0	1	1	293	5
gene959	0	5	0	0	1	275	5
gene984	2	3	0	1	1	188	5
gene1003	1	1	2	1	1	127	4
gene101	1	2	1	1	1	365	4
gene1015	2	2	0	1	1	313	4
gene103	0	4	0	0	1	274	4
gene1053	0	4	0	0	1	210	4
gene1056	1	3	0	1	1	139	4
gene1095	1	3	0	1	1	196	4
gene1150	1	2	1	1	1	111	4
gene118	0	2	2	1	1	282	4
gene1188	1	1	2	1	1	110	4
gene1208	2	1	1	1	1	75	4
gene1230	0	3	1	1	1	211	4
gene125	1	3	0	1	1	238	4
gene127	2	2	0	1	1	340	4
gene133	0	3	1	1	1	286	4
gene1346	0	3	1	1	1	195	4
gene1356	2	2	0	1	1	140	4
gene136	0	4	0	0	1	246	4
gene1379	1	2	1	1	1	232	4
gene1406	1	2	1	1	1	95	4
gene1433	1	2	1	1	1	73	4
gene1437	1	3	0	1	1	151	4
gene146	0	3	1	1	1	181	4
gene1474	0	4	0	0	1	154	4
gene1544	2	1	1	1	1	320	4
gene1546	0	4	0	0	1	208	4
gene1547	0	4	0	0	1	319	4
gene157	0	3	1	1	1	222	4
gene1631	1	1	2	1	1	235	4
gene1690	1	3	0	1	1	252	4
gene179	1	3	0	1	1	455	4
gene180	0	4	0	0	1	383	4
gene187	0	3	1	1	1	171	4
gene194	0	3	1	1	1	434	4
gene199	0	3	1	1	1	156	4
gene20	1	3	0	1	1	338	4
gene201	0	4	0	0	1	210	4
gene209	2	2	0	1	1	397	4
gene228	1	3	0	1	1	178	4
gene231	2	1	1	1	1	292	4
gene235	0	4	0	0	1	146	4
gene256	0	3	1	1	1	130	4
gene280	0	2	2	1	1	369	4
gene289	0	4	0	0	1	199	4
gene346	0	1	3	1	1	311	4
gene369	0	3	1	1	1	250	4
gene370	0	4	0	0	1	600	4
gene372	0	4	0	0	1	570	4
gene375	0	1	3	1	1	151	4
gene383	0	3	1	1	1	181	4
gene41	0	4	0	0	1	270	4
gene410	2	1	1	1	1	357	4
gene417	1	2	1	1	1	225	4
gene422	0	3	1	1	1	286	4
gene425	0	4	0	0	1	162	4
gene427	0	3	1	1	1	211	4
gene442	2	0	2	1	1	216	4
gene45	2	1	1	1	1	450	4
gene451	0	4	0	0	1	276	4
gene46	1	1	2	1	1	180	4
gene475	2	2	0	1	1	196	4
gene493	1	2	1	1	1	215	4
gene547	1	3	0	1	1	397	4
gene565	1	2	1	1	1	336	4
gene569	0	4	0	0	1	236	4
gene598	0	2	2	1	1	138	4
gene605	1	2	1	1	1	222	4
gene61	0	4	0	0	1	321	4
gene625	0	4	0	0	1	205	4
gene641	0	4	0	0	1	146	4
gene653	0	4	0	0	1	108	4
gene654	0	3	1	1	1	402	4
gene664	0	3	1	1	1	304	4
gene667	2	2	0	1	1	139	4
gene668	0	4	0	0	1	236	4
gene700	2	2	0	1	1	97	4
gene730	0	4	0	0	1	107	4
gene742	0	2	2	1	1	352	4
gene793	1	3	0	1	1	266	4
gene815	0	3	1	1	1	184	4
gene827	1	3	0	1	1	243	4
gene829	0	4	0	0	1	226	4
gene839	0	4	0	0	1	259	4
gene868	1	2	1	1	1	156	4
gene923	0	4	0	0	1	320	4
gene95	1	3	0	1	1	366	4
gene97	1	3	0	1	1	423	4
gene992	0	4	0	0	1	154	4
gene997	1	3	0	1	1	216	4
gene1	0	2	1	1	1	328	3
gene100	3	0	0	0	1	195	3
gene1001	1	2	0	1	1	73	3
gene1006	0	3	0	0	1	178	3
gene1012	0	3	0	0	1	161	3
gene1013	1	2	0	1	1	155	3
gene1016	1	1	1	1	1	182	3
gene1017	1	2	0	1	1	331	3
gene1021	0	3	0	0	1	130	3
gene1054	0	2	1	1	1	293	3
gene1064	2	1	0	1	1	134	3
gene1066	0	3	0	0	1	233	3
gene1070	2	0	1	1	1	178	3
gene1073	1	2	0	1	1	223	3
gene1079	0	3	0	0	1	182	3
gene1082	0	2	1	1	1	221	3
gene1093	1	1	1	1	1	125	3
gene1096	0	1	2	1	1	102	3
gene1098	0	2	1	1	1	153	3
gene1100	1	2	0	1	1	205	3
gene1106	0	3	0	0	1	120	3
gene1111	0	2	1	1	1	200	3
gene1114	0	3	0	0	1	252	3
gene1121	2	1	0	1	1	144	3
gene1135	0	3	0	0	1	93	3
gene1140	1	2	0	1	1	192	3
gene1145	0	3	0	0	1	124	3
gene1147	0	3	0	0	1	118	3
gene115	2	1	0	1	1	222	3
gene1180	2	0	1	1	1	101	3
gene1203	0	3	0	0	1	112	3
gene1233	0	1	2	1	1	184	3
gene1245	1	2	0	1	1	121	3
gene1258	0	3	0	0	1	288	3
gene1261	0	1	2	1	1	103	3
gene1275	1	2	0	1	1	148	3
gene1286	0	2	1	1	1	135	3
gene1311	0	3	0	0	1	72	3
gene1317	0	0	3	0	1	238	3
gene1329	1	2	0	1	1	291	3
gene134	1	2	0	1	1	299	3
gene1353	0	3	0	0	1	158	3
gene1357	0	2	1	1	1	237	3
gene1358	0	3	0	0	1	151	3
gene1361	0	3	0	0	1	191	3
gene1377	1	2	0	1	1	153	3
gene1386	0	3	0	0	1	139	3
gene1401	0	3	0	0	1	97	3
gene1418	0	3	0	0	1	121	3
gene1448	1	2	0	1	1	123	3
gene1456	0	3	0	0	1	130	3
gene1479	0	1	2	1	1	91	3
gene1482	0	2	1	1	1	65	3
gene1491	3	0	0	0	1	208	3
gene15	0	3	0	0	1	240	3
gene1508	1	1	1	1	1	124	3
gene1540	0	1	2	1	1	111	3
gene1541	0	1	2	1	1	105	3
gene1553	1	1	1	1	1	113	3
gene1577	0	3	0	0	1	107	3
gene158	0	2	1	1	1	137	3
gene1582	2	0	1	1	1	131	3
gene1586	0	2	1	1	1	113	3
gene1607	2	0	1	1	1	230	3
gene1617	1	2	0	1	1	103	3
gene163	0	3	0	0	1	185	3
gene1648	0	3	0	0	1	162	3
gene1654	0	3	0	0	1	145	3
gene1671	1	2	0	1	1	131	3
gene168	0	3	0	0	1	87	3
gene1685	0	3	0	0	1	95	3
gene17	1	2	0	1	1	305	3
gene1703	0	1	2	1	1	140	3
gene1716	0	3	0	0	1	92	3
gene178	0	3	0	0	1	198	3
gene181	1	2	0	1	1	209	3
gene182	1	1	1	1	1	198	3
gene186	1	2	0	1	1	193	3
gene210	0	3	0	0	1	206	3
gene230	0	2	1	1	1	478	3
gene232	0	3	0	0	1	379	3
gene233	2	1	0	1	1	364	3
gene237	0	3	0	0	1	200	3
gene239	0	3	0	0	1	317	3
gene248	0	3	0	0	1	301	3
gene277	0	3	0	0	1	227	3
gene279	0	1	2	1	1	367	3
gene287	1	2	0	1	1	329	3
gene292	0	1	2	1	1	227	3
gene295	1	2	0	1	1	366	3
gene302	1	2	0	1	1	404	3
gene309	0	3	0	0	1	150	3
gene312	0	3	0	0	1	156	3
gene320	0	3	0	0	1	301	3
gene323	0	3	0	0	1	286	3
gene332	0	3	0	0	1	287	3
gene333	1	2	0	1	1	550	3
gene334	0	2	1	1	1	119	3
gene342	1	2	0	1	1	117	3
gene344	2	0	1	1	1	401	3
gene364	1	2	0	1	1	214	3
gene367	0	3	0	0	1	511	3
gene371	0	3	0	0	1	175	3
gene374	1	2	0	1	1	177	3
gene378	0	2	1	1	1	132	3
gene382	0	3	0	0	1	218	3
gene384	2	1	0	1	1	124	3
gene397	2	1	0	1	1	187	3
gene412	0	3	0	0	1	148	3
gene420	0	2	1	1	1	183	3
gene43	1	2	0	1	1	292	3
gene444	1	1	1	1	1	270	3
gene446	1	2	0	1	1	311	3
gene459	2	1	0	1	1	201	3
gene470	1	2	0	1	1	125	3
gene471	0	3	0	0	1	70	3
gene48	0	3	0	0	1	487	3
gene485	0	2	1	1	1	376	3
gene488	0	3	0	0	1	172	3
gene495	0	2	1	1	1	158	3
gene497	0	3	0	0	1	151	3
gene511	1	1	1	1	1	261	3
gene519	0	3	0	0	1	180	3
gene526	0	3	0	0	1	184	3
gene529	0	3	0	0	1	174	3
gene538	0	2	1	1	1	86	3
gene541	1	2	0	1	1	176	3
gene543	1	2	0	1	1	137	3
gene546	0	3	0	0	1	196	3
gene549	0	3	0	0	1	280	3
gene553	1	2	0	1	1	157	3
gene557	0	2	1	1	1	381	3
gene566	0	3	0	0	1	136	3
gene567	0	3	0	0	1	339	3
gene570	1	2	0	1	1	141	3
gene577	0	3	0	0	1	149	3
gene586	1	1	1	1	1	162	3
gene588	1	2	0	1	1	257	3
gene591	0	3	0	0	1	242	3
gene594	0	3	0	0	1	446	3
gene600	0	1	2	1	1	443	3
gene602	0	2	1	1	1	237	3
gene606	1	2	0	1	1	222	3
gene618	2	1	0	1	1	103	3
gene622	0	2	1	1	1	177	3
gene634	1	1	1	1	1	208	3
gene64	0	2	1	1	1	183	3
gene657	0	2	1	1	1	128	3
gene675	1	2	0	1	1	431	3
gene68	1	2	0	1	1	202	3
gene687	2	0	1	1	1	306	3
gene7	0	3	0	0	1	236	3
gene704	0	3	0	0	1	199	3
gene707	1	2	0	1	1	81	3
gene719	1	2	0	1	1	174	3
gene723	0	3	0	0	1	803	3
gene733	1	2	0	1	1	201	3
gene735	1	1	1	1	1	140	3
gene745	0	2	1	1	1	182	3
gene760	0	3	0	0	1	142	3
gene762	0	3	0	0	1	168	3
gene766	0	2	1	1	1	108	3
gene782	0	3	0	0	1	279	3
gene792	0	2	1	1	1	269	3
gene8	2	1	0	1	1	203	3
gene806	2	1	0	1	1	205	3
gene81	0	3	0	0	1	240	3
gene819	1	2	0	1	1	237	3
gene82	0	3	0	0	1	305	3
gene822	2	1	0	1	1	71	3
gene84	0	1	2	1	1	223	3
gene843	0	3	0	0	1	176	3
gene869	0	3	0	0	1	178	3
gene88	1	0	2	1	1	303	3
gene888	0	3	0	0	1	302	3
gene89	0	3	0	0	1	514	3
gene902	2	1	0	1	1	165	3
gene906	0	2	1	1	1	147	3
gene912	0	3	0	0	1	188	3
gene928	0	2	1	1	1	141	3
gene938	0	2	1	1	1	185	3
gene941	0	3	0	0	1	201	3
gene949	1	2	0	1	1	158	3
gene958	1	1	1	1	1	171	3
gene961	0	3	0	0	1	91	3
gene971	0	3	0	0	1	152	3
gene977	0	3	0	0	1	169	3
gene994	0	3	0	0	1	125	3
gene10	1	1	0	1	1	301	2
gene1005	1	1	0	1	1	150	2
gene1019	0	2	0	0	1	164	2
gene1027	1	1	0	1	1	115	2
gene1033	1	0	1	1	1	149	2
gene1036	1	1	0	1	1	101	2
gene1037	0	2	0	0	1	117	2
gene104	0	2	0	0	1	105	2
gene1041	0	2	0	0	1	100	2
gene1043	0	1	1	1	1	67	2
gene1058	0	1	1	1	1	150	2
gene106	1	0	1	1	1	128	2
gene1068	1	1	0	1	1	329	2
gene1075	0	2	0	0	1	108	2
gene1078	1	1	0	1	1	66	2
gene1085	0	1	1	1	1	463	2
gene1086	0	2	0	0	1	93	2
gene1087	0	2	0	0	1	161	2
gene1088	1	1	0	1	1	132	2
gene109	0	2	0	0	1	175	2
gene11	0	1	1	1	1	294	2
gene1101	0	2	0	0	1	137	2
gene1102	0	2	0	0	1	132	2
gene1115	1	1	0	1	1	231	2
gene1119	0	2	0	0	1	154	2
gene1123	0	1	1	1	1	145	2
gene1128	0	2	0	0	1	159	2
gene1129	0	2	0	0	1	201	2
gene1148	1	1	0	1	1	200	2
gene1153	1	1	0	1	1	129	2
gene1154	0	1	1	1	1	100	2
gene1155	0	0	2	0	1	181	2
gene1156	2	0	0	0	1	154	2
gene1161	0	2	0	0	1	178	2
gene1165	0	2	0	0	1	160	2
gene1168	0	2	0	0	1	215	2
gene117	0	2	0	0	1	254	2
gene1174	0	2	0	0	1	271	2
gene1175	0	2	0	0	1	251	2
gene1176	1	0	1	1	1	139	2
gene1177	0	1	1	1	1	212	2
gene1186	0	2	0	0	1	172	2
gene1187	0	2	0	0	1	92	2
gene1196	2	0	0	0	1	211	2
gene1197	0	2	0	0	1	103	2
gene1198	0	1	1	1	1	85	2
gene12	1	1	0	1	1	161	2
gene121	0	2	0	0	1	264	2
gene1215	0	2	0	0	1	124	2
gene1234	1	0	1	1	1	117	2
gene1240	0	0	2	0	1	278	2
gene1241	0	1	1	1	1	186	2
gene1251	0	1	1	1	1	73	2
gene1254	0	2	0	0	1	122	2
gene126	0	1	1	1	1	239	2
gene1262	0	2	0	0	1	128	2
gene1264	0	1	1	1	1	164	2
gene1270	0	1	1	1	1	121	2
gene1276	1	1	0	1	1	152	2
gene1279	0	2	0	0	1	123	2
gene128	1	0	1	1	1	272	2
gene129	1	1	0	1	1	213	2
gene1290	0	1	1	1	1	83	2
gene1295	1	1	0	1	1	94	2
gene1296	0	2	0	0	1	113	2
gene1297	0	2	0	0	1	131	2
gene1298	0	2	0	0	1	116	2
gene13	0	2	0	0	1	157	2
gene1307	0	1	1	1	1	85	2
gene1308	0	1	1	1	1	196	2
gene1315	0	1	1	1	1	323	2
gene1318	1	1	0	1	1	290	2
gene1319	0	2	0	0	1	227	2
gene1320	0	1	1	1	1	170	2
gene1321	0	2	0	0	1	306	2
gene1323	0	2	0	0	1	193	2
gene1328	0	2	0	0	1	112	2
gene1330	1	1	0	1	1	244	2
gene1333	0	2	0	0	1	225	2
gene1336	0	2	0	0	1	100	2
gene1341	0	1	1	1	1	97	2
gene1343	1	1	0	1	1	71	2
gene1347	2	0	0	0	1	71	2
gene1352	1	1	0	1	1	401	2
gene1354	0	0	2	0	1	128	2
gene1355	2	0	0	0	1	130	2
gene138	1	1	0	1	1	238	2
gene1382	1	1	0	1	1	176	2
gene1383	1	1	0	1	1	93	2
gene1384	0	2	0	0	1	327	2
gene1396	1	0	1	1	1	168	2
gene1399	0	2	0	0	1	84	2
gene140	2	0	0	0	1	418	2
gene1407	0	1	1	1	1	141	2
gene1410	0	2	0	0	1	144	2
gene1412	1	1	0	1	1	109	2
gene1414	0	2	0	0	1	101	2
gene1415	2	0	0	0	1	118	2
gene1419	0	2	0	0	1	150	2
gene1428	0	2	0	0	1	93	2
gene143	0	2	0	0	1	273	2
gene1431	0	2	0	0	1	152	2
gene1440	0	2	0	0	1	134	2
gene1441	0	1	1	1	1	183	2
gene1446	1	1	0	1	1	120	2
gene1454	0	2	0	0	1	292	2
gene1457	0	1	1	1	1	102	2
gene1458	0	2	0	0	1	309	2
gene1459	0	2	0	0	1	89	2
gene1464	0	2	0	0	1	130	2
gene1466	0	0	2	0	1	124	2
gene1470	0	2	0	0	1	121	2
gene1472	0	1	1	1	1	155	2
gene1473	1	0	1	1	1	143	2
gene1478	0	2	0	0	1	95	2
gene148	1	1	0	1	1	246	2
gene1484	1	0	1	1	1	84	2
gene1487	1	1	0	1	1	224	2
gene1488	0	2	0	0	1	93	2
gene1489	1	1	0	1	1	316	2
gene1494	0	0	2	0	1	80	2
gene1496	0	2	0	0	1	112	2
gene1499	1	1	0	1	1	178	2
gene151	0	1	1	1	1	162	2
gene1513	0	2	0	0	1	107	2
gene1515	0	0	2	0	1	122	2
gene1517	1	1	0	1	1	144	2
gene1518	0	2	0	0	1	123	2
gene1525	1	1	0	1	1	141	2
gene1527	1	1	0	1	1	79	2
gene1528	0	2	0	0	1	136	2
gene1531	0	2	0	0	1	156	2
gene1535	1	0	1	1	1	113	2
gene1537	0	2	0	0	1	91	2
gene1539	0	2	0	0	1	70	2
gene1543	1	1	0	1	1	327	2
gene1548	1	1	0	1	1	132	2
gene1549	1	1	0	1	1	144	2
gene1550	1	1	0	1	1	99	2
gene1555	1	1	0	1	1	270	2
gene1557	1	1	0	1	1	98	2
gene1561	2	0	0	0	1	177	2
gene1583	0	2	0	0	1	68	2
gene1589	1	0	1	1	1	180	2
gene1591	1	1	0	1	1	113	2
gene1594	1	1	0	1	1	90	2
gene1597	0	2	0	0	1	129	2
gene1600	1	1	0	1	1	122	2
gene1606	0	2	0	0	1	112	2
gene161	0	1	1	1	1	343	2
gene1610	0	2	0	0	1	87	2
gene1637	0	1	1	1	1	169	2
gene1640	0	1	1	1	1	91	2
gene165	0	2	0	0	1	208	2
gene1650	1	1	0	1	1	107	2
gene1651	1	1	0	1	1	239	2
gene1657	0	2	0	0	1	72	2
gene1674	2	0	0	0	1	184	2
gene1680	0	2	0	0	1	247	2
gene1692	0	2	0	0	1	70	2
gene1696	2	0	0	0	1	90	2
gene170	0	2	0	0	1	239	2
gene174	0	0	2	0	1	97	2
gene184	1	1	0	1	1	252	2
gene193	0	2	0	0	1	132	2
gene195	0	2	0	0	1	129	2
gene202	0	2	0	0	1	178	2
gene203	0	1	1	1	1	114	2
gene204	0	1	1	1	1	312	2
gene218	0	2	0	0	1	231	2
gene238	0	2	0	0	1	198	2
gene24	0	2	0	0	1	237	2
gene247	1	1	0	1	1	294	2
gene25	2	0	0	0	1	387	2
gene251	0	2	0	0	1	196	2
gene253	0	2	0	0	1	110	2
gene259	0	2	0	0	1	693	2
gene261	0	1	1	1	1	289	2
gene264	0	1	1	1	1	172	2
gene271	1	0	1	1	1	331	2
gene281	1	1	0	1	1	243	2
gene284	0	1	1	1	1	338	2
gene29	0	2	0	0	1	148	2
gene290	0	1	1	1	1	94	2
gene3	0	2	0	0	1	362	2
gene306	1	1	0	1	1	194	2
gene310	1	0	1	1	1	306	2
gene319	0	2	0	0	1	151	2
gene324	0	2	0	0	1	308	2
gene327	0	2	0	0	1	124	2
gene328	0	2	0	0	1	102	2
gene335	0	2	0	0	1	115	2
gene339	0	1	1	1	1	169	2
gene347	2	0	0	0	1	256	2
gene348	1	1	0	1	1	341	2
gene354	0	1	1	1	1	246	2
gene356	1	1	0	1	1	170	2
gene362	0	2	0	0	1	202	2
gene366	0	2	0	0	1	331	2
gene377	0	2	0	0	1	230	2
gene379	0	2	0	0	1	256	2
gene381	0	2	0	0	1	280	2
gene388	0	2	0	0	1	284	2
gene389	1	1	0	1	1	115	2
gene392	2	0	0	0	1	234	2
gene395	0	2	0	0	1	252	2
gene399	1	1	0	1	1	142	2
gene406	2	0	0	0	1	144	2
gene408	0	2	0	0	1	143	2
gene419	0	0	2	0	1	236	2
gene431	0	2	0	0	1	313	2
gene435	0	2	0	0	1	190	2
gene443	1	1	0	1	1	223	2
gene445	1	1	0	1	1	236	2
gene447	0	2	0	0	1	331	2
gene448	0	2	0	0	1	131	2
gene453	1	1	0	1	1	349	2
gene462	2	0	0	0	1	138	2
gene463	0	1	1	1	1	132	2
gene474	0	1	1	1	1	460	2
gene486	0	2	0	0	1	138	2
gene487	0	2	0	0	1	86	2
gene491	0	1	1	1	1	116	2
gene496	0	1	1	1	1	205	2
gene502	0	1	1	1	1	405	2
gene514	0	2	0	0	1	312	2
gene517	0	2	0	0	1	83	2
gene521	2	0	0	0	1	286	2
gene522	0	2	0	0	1	144	2
gene531	0	2	0	0	1	213	2
gene539	0	1	1	1	1	137	2
gene545	0	2	0	0	1	274	2
gene554	0	2	0	0	1	102	2
gene555	1	1	0	1	1	436	2
gene563	2	0	0	0	1	198	2
gene576	0	2	0	0	1	332	2
gene579	0	2	0	0	1	162	2
gene581	0	2	0	0	1	153	2
gene589	1	1	0	1	1	53	2
gene590	0	2	0	0	1	131	2
gene599	0	1	1	1	1	184	2
gene6	1	1	0	1	1	251	2
gene601	0	1	1	1	1	345	2
gene617	0	1	1	1	1	88	2
gene620	0	2	0	0	1	230	2
gene630	0	1	1	1	1	73	2
gene637	1	1	0	1	1	97	2
gene643	0	2	0	0	1	163	2
gene645	0	2	0	0	1	444	2
gene648	0	2	0	0	1	102	2
gene65	0	2	0	0	1	234	2
gene650	0	2	0	0	1	277	2
gene651	1	0	1	1	1	243	2
gene66	0	2	0	0	1	322	2
gene666	0	1	1	1	1	158	2
gene67	1	1	0	1	1	256	2
gene684	0	2	0	0	1	146	2
gene685	0	1	1	1	1	229	2
gene69	1	0	1	1	1	173	2
gene696	0	2	0	0	1	269	2
gene705	0	2	0	0	1	224	2
gene706	0	2	0	0	1	252	2
gene71	0	2	0	0	1	113	2
gene714	0	2	0	0	1	66	2
gene716	0	1	1	1	1	96	2
gene721	1	1	0	1	1	119	2
gene743	0	2	0	0	1	211	2
gene746	1	1	0	1	1	99	2
gene749	0	2	0	0	1	378	2
gene75	0	2	0	0	1	201	2
gene755	0	2	0	0	1	177	2
gene769	1	1	0	1	1	92	2
gene770	0	2	0	0	1	179	2
gene773	1	1	0	1	1	116	2
gene775	0	2	0	0	1	284	2
gene776	0	1	1	1	1	248	2
gene778	0	2	0	0	1	188	2
gene779	1	1	0	1	1	120	2
gene797	0	1	1	1	1	91	2
gene800	0	1	1	1	1	272	2
gene808	1	1	0	1	1	101	2
gene813	0	2	0	0	1	139	2
gene814	1	1	0	1	1	158	2
gene820	0	2	0	0	1	181	2
gene824	0	1	1	1	1	250	2
gene828	0	2	0	0	1	98	2
gene831	1	1	0	1	1	171	2
gene834	2	0	0	0	1	106	2
gene836	1	0	1	1	1	399	2
gene844	0	2	0	0	1	180	2
gene848	1	1	0	1	1	202	2
gene861	0	1	1	1	1	100	2
gene862	0	1	1	1	1	198	2
gene865	1	1	0	1	1	74	2
gene866	0	1	1	1	1	76	2
gene867	0	2	0	0	1	124	2
gene871	0	2	0	0	1	187	2
gene873	0	2	0	0	1	75	2
gene880	1	1	0	1	1	134	2
gene883	2	0	0	0	1	127	2
gene887	0	2	0	0	1	267	2
gene899	0	2	0	0	1	104	2
gene900	0	2	0	0	1	207	2
gene908	0	2	0	0	1	181	2
gene91	0	2	0	0	1	253	2
gene914	0	1	1	1	1	182	2
gene915	1	1	0	1	1	271	2
gene917	0	1	1	1	1	115	2
gene918	0	2	0	0	1	246	2
gene919	0	2	0	0	1	150	2
gene931	1	1	0	1	1	310	2
gene933	1	0	1	1	1	114	2
gene945	1	1	0	1	1	134	2
gene952	0	2	0	0	1	135	2
gene955	0	1	1	1	1	138	2
gene956	0	1	1	1	1	260	2
gene962	0	2	0	0	1	109	2
gene963	0	2	0	0	1	245	2
gene967	0	2	0	0	1	103	2
gene972	0	2	0	0	1	140	2
gene974	1	1	0	1	1	88	2
gene975	1	1	0	1	1	138	2
gene979	0	1	1	1	1	78	2
gene981	1	1	0	1	1	175	2
gene983	0	1	1	1	1	58	2
gene985	0	1	1	1	1	102	2
gene1002	0	1	0	0	0	102	1
gene1010	0	1	0	0	0	112	1
gene1014	0	1	0	0	0	146	1
gene1024	0	1	0	0	0	145	1
gene1028	0	1	0	0	0	179	1
gene1032	0	1	0	0	0	120	1
gene1034	0	0	1	0	0	160	1
gene1038	1	0	0	0	0	83	1
gene1040	1	0	0	0	0	106	1
gene1042	0	1	0	0	0	101	1
gene1044	0	1	0	0	0	88	1
gene1047	0	1	0	0	0	135	1
gene1049	0	1	0	0	0	139	1
gene105	0	1	0	0	0	154	1
gene1059	0	0	1	0	0	310	1
gene1062	0	1	0	0	0	82	1
gene1069	0	1	0	0	0	125	1
gene107	0	1	0	0	0	144	1
gene1071	0	1	0	0	0	102	1
gene1074	0	0	1	0	0	86	1
gene108	1	0	0	0	0	179	1
gene1084	0	1	0	0	0	80	1
gene1089	0	1	0	0	0	103	1
gene1090	0	1	0	0	0	157	1
gene1094	0	0	1	0	0	320	1
gene1103	0	1	0	0	0	159	1
gene1104	0	1	0	0	0	301	1
gene1105	0	1	0	0	0	195	1
gene1109	0	1	0	0	0	208	1
gene111	0	1	0	0	0	144	1
gene1112	0	1	0	0	0	98	1
gene1113	1	0	0	0	0	238	1
gene1125	0	0	1	0	0	111	1
gene1126	0	1	0	0	0	276	1
gene1127	0	1	0	0	0	126	1
gene1131	0	0	1	0	0	172	1
gene1133	0	1	0	0	0	132	1
gene1134	1	0	0	0	0	121	1
gene114	1	0	0	0	0	261	1
gene1142	0	1	0	0	0	125	1
gene1143	1	0	0	0	0	115	1
gene1146	0	1	0	0	0	75	1
gene1149	0	0	1	0	0	183	1
gene1151	0	1	0	0	0	72	1
gene1157	0	1	0	0	0	97	1
gene1170	0	1	0	0	0	114	1
gene1171	0	0	1	0	0	92	1
gene1178	1	0	0	0	0	216	1
gene1179	0	1	0	0	0	143	1
gene1182	0	1	0	0	0	153	1
gene1185	0	1	0	0	0	330	1
gene1193	0	0	1	0	0	114	1
gene1195	0	1	0	0	0	75	1
gene1201	1	0	0	0	0	56	1
gene1214	0	1	0	0	0	169	1
gene1216	0	1	0	0	0	69	1
gene122	0	1	0	0	0	100	1
gene1228	0	1	0	0	0	83	1
gene1229	0	0	1	0	0	75	1
gene1235	1	0	0	0	0	200	1
gene1237	0	1	0	0	0	165	1
gene1238	0	1	0	0	0	127	1
gene1243	1	0	0	0	0	122	1
gene1244	0	1	0	0	0	73	1
gene1246	0	1	0	0	0	64	1
gene1248	0	1	0	0	0	120	1
gene1250	1	0	0	0	0	164	1
gene1256	0	0	1	0	0	109	1
gene1266	0	1	0	0	0	69	1
gene1273	0	1	0	0	0	90	1
gene1277	0	0	1	0	0	179	1
gene1281	0	1	0	0	0	145	1
gene1282	0	1	0	0	0	88	1
gene1287	0	1	0	0	0	67	1
gene1291	0	1	0	0	0	216	1
gene1301	0	1	0	0	0	104	1
gene131	0	1	0	0	0	85	1
gene1313	0	0	1	0	0	92	1
gene1326	0	1	0	0	0	128	1
gene1331	0	1	0	0	0	175	1
gene1332	0	1	0	0	0	65	1
gene1337	0	1	0	0	0	188	1
gene1342	0	1	0	0	0	82	1
gene1351	0	0	1	0	0	478	1
gene1363	1	0	0	0	0	106	1
gene137	0	1	0	0	0	233	1
gene1370	1	0	0	0	0	77	1
gene1371	0	1	0	0	0	173	1
gene1372	0	1	0	0	0	250	1
gene1373	1	0	0	0	0	81	1
gene1374	1	0	0	0	0	251	1
gene1376	1	0	0	0	0	89	1
gene1380	0	1	0	0	0	123	1
gene139	0	0	1	0	0	236	1
gene1392	0	1	0	0	0	75	1
gene1393	0	1	0	0	0	103	1
gene1394	0	1	0	0	0	177	1
gene1398	0	1	0	0	0	160	1
gene14	0	1	0	0	0	294	1
gene1400	1	0	0	0	0	102	1
gene1405	0	1	0	0	0	84	1
gene1408	0	1	0	0	0	108	1
gene1409	0	1	0	0	0	95	1
gene1413	0	1	0	0	0	110	1
gene1417	0	1	0	0	0	97	1
gene142	0	1	0	0	0	199	1
gene1420	0	1	0	0	0	67	1
gene1426	0	1	0	0	0	75	1
gene1427	0	0	1	0	0	98	1
gene1430	0	0	1	0	0	108	1
gene1432	0	1	0	0	0	141	1
gene1435	0	0	1	0	0	84	1
gene1438	0	1	0	0	0	115	1
gene144	0	0	1	0	0	227	1
gene145	0	1	0	0	0	133	1
gene1451	0	1	0	0	0	90	1
gene1452	0	1	0	0	0	99	1
gene1455	1	0	0	0	0	175	1
gene1460	0	1	0	0	0	291	1
gene1461	0	1	0	0	0	96	1
gene1462	0	1	0	0	0	163	1
gene1463	1	0	0	0	0	174	1
gene1465	0	1	0	0	0	72	1
gene1467	0	0	1	0	0	208	1
gene147	0	1	0	0	0	81	1
gene1471	0	0	1	0	0	80	1
gene1477	0	1	0	0	0	72	1
gene1480	1	0	0	0	0	120	1
gene1485	0	0	1	0	0	92	1
gene1492	0	1	0	0	0	93	1
gene1493	0	0	1	0	0	72	1
gene1501	1	0	0	0	0	113	1
gene1507	1	0	0	0	0	157	1
gene1509	0	0	1	0	0	83	1
gene1521	0	0	1	0	0	470	1
gene1529	0	1	0	0	0	143	1
gene1530	0	1	0	0	0	114	1
gene1554	0	1	0	0	0	92	1
gene1559	1	0	0	0	0	89	1
gene1562	0	1	0	0	0	60	1
gene1563	0	1	0	0	0	132	1
gene1564	0	1	0	0	0	104	1
gene1569	0	1	0	0	0	79	1
gene1570	0	1	0	0	0	109	1
gene1571	0	1	0	0	0	127	1
gene1574	0	1	0	0	0	130	1
gene1575	1	0	0	0	0	71	1
gene1576	0	1	0	0	0	257	1
gene1587	1	0	0	0	0	43	1
gene159	0	1	0	0	0	79	1
gene1599	0	0	1	0	0	112	1
gene16	0	1	0	0	0	324	1
gene160	1	0	0	0	0	169	1
gene1601	0	0	1	0	0	100	1
gene1604	0	1	0	0	0	136	1
gene1612	0	1	0	0	0	64	1
gene1614	0	1	0	0	0	135	1
gene1618	0	1	0	0	0	130	1
gene162	0	1	0	0	0	168	1
gene1624	0	1	0	0	0	69	1
gene1625	0	1	0	0	0	133	1
gene1628	0	1	0	0	0	181	1
gene1629	0	0	1	0	0	116	1
gene1632	1	0	0	0	0	150	1
gene1634	0	1	0	0	0	109	1
gene1635	0	0	1	0	0	158	1
gene1636	0	1	0	0	0	112	1
gene1638	1	0	0	0	0	195	1
gene1639	0	1	0	0	0	68	1
gene1641	1	0	0	0	0	70	1
gene1642	0	1	0	0	0	65	1
gene1649	0	1	0	0	0	249	1
gene1652	0	1	0	0	0	102	1
gene1653	0	1	0	0	0	84	1
gene1659	0	1	0	0	0	114	1
gene1660	0	1	0	0	0	100	1
gene1663	0	1	0	0	0	76	1
gene1664	1	0	0	0	0	134	1
gene1667	0	1	0	0	0	115	1
gene1668	0	1	0	0	0	83	1
gene1669	0	1	0	0	0	169	1
gene167	0	0	1	0	0	112	1
gene1670	1	0	0	0	0	80	1
gene1673	0	1	0	0	0	259	1
gene1676	0	1	0	0	0	221	1
gene1678	0	1	0	0	0	54	1
gene1683	0	1	0	0	0	60	1
gene169	0	0	1	0	0	164	1
gene1691	0	1	0	0	0	104	1
gene1694	0	0	1	0	0	81	1
gene1699	0	1	0	0	0	121	1
gene1706	0	1	0	0	0	55	1
gene171	0	0	1	0	0	111	1
gene1719	0	0	1	0	0	93	1
gene172	0	1	0	0	0	254	1
gene175	0	0	1	0	0	166	1
gene183	0	1	0	0	0	142	1
gene189	0	1	0	0	0	97	1
gene191	0	1	0	0	0	155	1
gene198	1	0	0	0	0	85	1
gene206	0	0	1	0	0	155	1
gene211	0	0	1	0	0	117	1
gene213	0	1	0	0	0	102	1
gene214	0	1	0	0	0	192	1
gene215	1	0	0	0	0	224	1
gene217	0	1	0	0	0	118	1
gene222	0	1	0	0	0	109	1
gene223	1	0	0	0	0	120	1
gene225	0	1	0	0	0	102	1
gene226	1	0	0	0	0	186	1
gene227	1	0	0	0	0	261	1
gene23	0	1	0	0	0	450	1
gene236	0	1	0	0	0	90	1
gene241	0	0	1	0	0	153	1
gene246	0	1	0	0	0	186	1
gene249	1	0	0	0	0	158	1
gene250	0	1	0	0	0	112	1
gene255	1	0	0	0	0	176	1
gene260	0	1	0	0	0	117	1
gene265	0	1	0	0	0	338	1
gene266	1	0	0	0	0	214	1
gene27	0	0	1	0	0	280	1
gene273	0	0	1	0	0	104	1
gene275	0	1	0	0	0	136	1
gene291	0	0	1	0	0	233	1
gene300	0	1	0	0	0	295	1
gene31	0	1	0	0	0	79	1
gene314	0	0	1	0	0	215	1
gene316	1	0	0	0	0	83	1
gene321	0	1	0	0	0	64	1
gene326	0	1	0	0	0	162	1
gene33	0	1	0	0	0	280	1
gene338	0	1	0	0	0	186	1
gene340	0	1	0	0	0	78	1
gene35	0	1	0	0	0	71	1
gene351	0	1	0	0	0	415	1
gene352	0	1	0	0	0	85	1
gene355	0	0	1	0	0	83	1
gene357	0	0	1	0	0	182	1
gene363	0	1	0	0	0	221	1
gene365	1	0	0	0	0	182	1
gene373	0	1	0	0	0	163	1
gene376	0	1	0	0	0	144	1
gene38	0	1	0	0	0	249	1
gene380	0	1	0	0	0	100	1
gene401	0	1	0	0	0	375	1
gene402	0	1	0	0	0	167	1
gene404	0	1	0	0	0	252	1
gene411	1	0	0	0	0	325	1
gene418	0	1	0	0	0	304	1
gene42	0	1	0	0	0	107	1
gene421	0	0	1	0	0	101	1
gene424	0	1	0	0	0	200	1
gene432	0	1	0	0	0	122	1
gene433	0	1	0	0	0	99	1
gene437	0	0	1	0	0	251	1
gene450	1	0	0	0	0	167	1
gene452	1	0	0	0	0	231	1
gene454	0	1	0	0	0	164	1
gene455	1	0	0	0	0	263	1
gene457	0	1	0	0	0	65	1
gene458	0	1	0	0	0	380	1
gene464	0	1	0	0	0	235	1
gene465	0	0	1	0	0	238	1
gene467	0	1	0	0	0	232	1
gene472	1	0	0	0	0	176	1
gene483	0	0	1	0	0	127	1
gene484	0	1	0	0	0	170	1
gene515	0	0	1	0	0	219	1
gene518	0	1	0	0	0	146	1
gene52	0	1	0	0	0	169	1
gene523	1	0	0	0	0	175	1
gene525	0	1	0	0	0	334	1
gene534	0	1	0	0	0	75	1
gene552	0	0	1	0	0	96	1
gene56	0	1	0	0	0	227	1
gene560	0	1	0	0	0	111	1
gene561	0	1	0	0	0	76	1
gene564	0	1	0	0	0	182	1
gene573	0	1	0	0	0	214	1
gene578	0	1	0	0	0	128	1
gene580	0	1	0	0	0	153	1
gene582	0	1	0	0	0	115	1
gene583	0	1	0	0	0	159	1
gene585	0	1	0	0	0	150	1
gene587	0	1	0	0	0	144	1
gene604	0	0	1	0	0	227	1
gene611	0	1	0	0	0	247	1
gene616	0	1	0	0	0	189	1
gene619	0	1	0	0	0	72	1
gene628	0	1	0	0	0	188	1
gene629	0	1	0	0	0	86	1
gene63	0	0	1	0	0	69	1
gene632	0	1	0	0	0	115	1
gene640	0	1	0	0	0	125	1
gene642	1	0	0	0	0	169	1
gene647	0	1	0	0	0	267	1
gene652	0	0	1	0	0	120	1
gene660	0	1	0	0	0	304	1
gene665	0	0	1	0	0	102	1
gene669	1	0	0	0	0	169	1
gene670	0	1	0	0	0	133	1
gene674	1	0	0	0	0	65	1
gene678	1	0	0	0	0	65	1
gene682	0	1	0	0	0	105	1
gene683	1	0	0	0	0	144	1
gene686	0	1	0	0	0	198	1
gene688	1	0	0	0	0	162	1
gene692	0	0	1	0	0	160	1
gene693	0	1	0	0	0	97	1
gene699	0	1	0	0	0	135	1
gene70	0	1	0	0	0	170	1
gene702	0	1	0	0	0	81	1
gene718	0	1	0	0	0	111	1
gene724	0	1	0	0	0	331	1
gene73	0	1	0	0	0	107	1
gene731	1	0	0	0	0	223	1
gene738	0	1	0	0	0	183	1
gene744	0	1	0	0	0	205	1
gene747	0	1	0	0	0	277	1
gene756	0	1	0	0	0	167	1
gene759	0	0	1	0	0	243	1
gene76	0	1	0	0	0	100	1
gene761	1	0	0	0	0	107	1
gene765	0	1	0	0	0	125	1
gene767	0	1	0	0	0	94	1
gene768	0	1	0	0	0	103	1
gene77	0	1	0	0	0	105	1
gene780	0	1	0	0	0	311	1
gene781	0	1	0	0	0	380	1
gene785	0	1	0	0	0	117	1
gene787	0	1	0	0	0	71	1
gene788	0	1	0	0	0	314	1
gene79	1	0	0	0	0	139	1
gene795	0	1	0	0	0	148	1
gene796	1	0	0	0	0	93	1
gene798	0	1	0	0	0	80	1
gene801	0	1	0	0	0	98	1
gene802	0	1	0	0	0	361	1
gene805	1	0	0	0	0	126	1
gene811	1	0	0	0	0	90	1
gene816	0	1	0	0	0	208	1
gene821	0	1	0	0	0	100	1
gene826	0	1	0	0	0	64	1
gene845	0	1	0	0	0	84	1
gene849	0	1	0	0	0	132	1
gene850	0	1	0	0	0	126	1
gene851	1	0	0	0	0	184	1
gene853	0	1	0	0	0	123	1
gene855	0	1	0	0	0	123	1
gene857	0	0	1	0	0	92	1
gene860	1	0	0	0	0	111	1
gene864	0	1	0	0	0	194	1
gene87	0	1	0	0	0	140	1
gene870	1	0	0	0	0	112	1
gene872	0	1	0	0	0	149	1
gene889	0	1	0	0	0	155	1
gene890	0	1	0	0	0	99	1
gene896	0	1	0	0	0	283	1
gene901	0	1	0	0	0	102	1
gene904	0	1	0	0	0	136	1
gene905	0	1	0	0	0	404	1
gene913	1	0	0	0	0	99	1
gene92	1	0	0	0	0	232	1
gene929	0	1	0	0	0	119	1
gene936	1	0	0	0	0	111	1
gene940	0	1	0	0	0	116	1
gene942	0	0	1	0	0	97	1
gene944	0	1	0	0	0	227	1
gene950	0	1	0	0	0	78	1
gene954	0	1	0	0	0	158	1
gene96	0	0	1	0	0	171	1
gene960	0	0	1	0	0	94	1
gene964	0	1	0	0	0	57	1
gene965	0	1	0	0	0	117	1
gene968	0	1	0	0	0	160	1
gene980	0	1	0	0	0	222	1
gene982	0	1	0	0	0	117	1
gene986	1	0	0	0	0	95	1
gene988	1	0	0	0	0	149	1
gene989	0	1	0	0	0	243	1
gene993	0	1	0	0	0	220	1
gene998	0	1	0	0	0	88	1
gene1000	0	0	0	0	0	128	0
gene1004	0	0	0	0	0	220	0
gene1008	0	0	0	0	0	211	0
gene1009	0	0	0	0	0	164	0
gene1011	0	0	0	0	0	126	0
gene1018	0	0	0	0	0	126	0
gene1022	0	0	0	0	0	158	0
gene1023	0	0	0	0	0	149	0
gene1025	0	0	0	0	0	69	0
gene1026	0	0	0	0	0	67	0
gene1029	0	0	0	0	0	139	0
gene1030	0	0	0	0	0	127	0
gene1031	0	0	0	0	0	69	0
gene1035	0	0	0	0	0	132	0
gene1039	0	0	0	0	0	114	0
gene1045	0	0	0	0	0	72	0
gene1046	0	0	0	0	0	77	0
gene1050	0	0	0	0	0	194	0
gene1051	0	0	0	0	0	79	0
gene1052	0	0	0	0	0	71	0
gene1055	0	0	0	0	0	85	0
gene1057	0	0	0	0	0	121	0
gene1061	0	0	0	0	0	61	0
gene1063	0	0	0	0	0	160	0
gene1065	0	0	0	0	0	130	0
gene1067	0	0	0	0	0	76	0
gene1072	0	0	0	0	0	142	0
gene1076	0	0	0	0	0	75	0
gene1077	0	0	0	0	0	73	0
gene1080	0	0	0	0	0	148	0
gene1081	0	0	0	0	0	135	0
gene1083	0	0	0	0	0	168	0
gene1091	0	0	0	0	0	115	0
gene1092	0	0	0	0	0	118	0
gene1099	0	0	0	0	0	101	0
gene1107	0	0	0	0	0	134	0
gene1108	0	0	0	0	0	95	0
gene1110	0	0	0	0	0	78	0
gene1116	0	0	0	0	0	119	0
gene1117	0	0	0	0	0	285	0
gene1118	0	0	0	0	0	85	0
gene1120	0	0	0	0	0	98	0
gene1122	0	0	0	0	0	119	0
gene1124	0	0	0	0	0	100	0
gene1130	0	0	0	0	0	89	0
gene1132	0	0	0	0	0	113	0
gene1136	0	0	0	0	0	109	0
gene1138	0	0	0	0	0	130	0
gene1139	0	0	0	0	0	128	0
gene1141	0	0	0	0	0	108	0
gene1144	0	0	0	0	0	197	0
gene1152	0	0	0	0	0	100	0
gene1158	0	0	0	0	0	79	0
gene1159	0	0	0	0	0	106	0
gene116	0	0	0	0	0	128	0
gene1160	0	0	0	0	0	146	0
gene1162	0	0	0	0	0	102	0
gene1163	0	0	0	0	0	114	0
gene1164	0	0	0	0	0	127	0
gene1166	0	0	0	0	0	93	0
gene1167	0	0	0	0	0	184	0
gene1169	0	0	0	0	0	170	0
gene1172	0	0	0	0	0	88	0
gene1173	0	0	0	0	0	143	0
gene1181	0	0	0	0	0	99	0
gene1183	0	0	0	0	0	113	0
gene1184	0	0	0	0	0	71	0
gene1189	0	0	0	0	0	112	0
gene119	0	0	0	0	0	216	0
gene1190	0	0	0	0	0	85	0
gene1191	0	0	0	0	0	201	0
gene1192	0	0	0	0	0	110	0
gene1194	0	0	0	0	0	86	0
gene1199	0	0	0	0	0	96	0
gene1200	0	0	0	0	0	72	0
gene1202	0	0	0	0	0	100	0
gene1204	0	0	0	0	0	77	0
gene1205	0	0	0	0	0	116	0
gene1206	0	0	0	0	0	84	0
gene1207	0	0	0	0	0	76	0
gene1209	0	0	0	0	0	77	0
gene1210	0	0	0	0	0	89	0
gene1211	0	0	0	0	0	252	0
gene1212	0	0	0	0	0	183	0
gene1213	0	0	0	0	0	95	0
gene1217	0	0	0	0	0	138	0
gene1218	0	0	0	0	0	164	0
gene1219	0	0	0	0	0	77	0
gene1220	0	0	0	0	0	140	0
gene1221	0	0	0	0	0	74	0
gene1222	0	0	0	0	0	109	0
gene1223	0	0	0	0	0	155	0
gene1224	0	0	0	0	0	124	0
gene1225	0	0	0	0	0	77	0
gene1226	0	0	0	0	0	75	0
gene1227	0	0	0	0	0	173	0
gene123	0	0	0	0	0	174	0
gene1231	0	0	0	0	0	80	0
gene1232	0	0	0	0	0	69	0
gene1236	0	0	0	0	0	105	0
gene1239	0	0	0	0	0	93	0
gene124	0	0	0	0	0	214	0
gene1242	0	0	0	0	0	75	0
gene1247	0	0	0	0	0	139	0
gene1249	0	0	0	0	0	128	0
gene1252	0	0	0	0	0	141	0
gene1253	0	0	0	0	0	111	0
gene1255	0	0	0	0	0	73	0
gene1257	0	0	0	0	0	82	0
gene1259	0	0	0	0	0	144	0
gene1260	0	0	0	0	0	90	0
gene1263	0	0	0	0	0	93	0
gene1265	0	0	0	0	0	141	0
gene1267	0	0	0	0	0	96	0
gene1268	0	0	0	0	0	113	0
gene1269	0	0	0	0	0	141	0
gene1271	0	0	0	0	0	199	0
gene1272	0	0	0	0	0	85	0
gene1274	0	0	0	0	0	133	0
gene1278	0	0	0	0	0	179	0
gene1280	0	0	0	0	0	72	0
gene1283	0	0	0	0	0	76	0
gene1285	0	0	0	0	0	154	0
gene1288	0	0	0	0	0	81	0
gene1289	0	0	0	0	0	77	0
gene1292	0	0	0	0	0	75	0
gene1293	0	0	0	0	0	151	0
gene1294	0	0	0	0	0	152	0
gene1299	0	0	0	0	0	67	0
gene1302	0	0	0	0	0	76	0
gene1303	0	0	0	0	0	108	0
gene1304	0	0	0	0	0	104	0
gene1305	0	0	0	0	0	118	0
gene1306	0	0	0	0	0	217	0
gene1309	0	0	0	0	0	172	0
gene1310	0	0	0	0	0	126	0
gene1312	0	0	0	0	0	86	0
gene1314	0	0	0	0	0	158	0
gene132	0	0	0	0	0	283	0
gene1322	0	0	0	0	0	375	0
gene1325	0	0	0	0	0	54	0
gene1334	0	0	0	0	0	78	0
gene1335	0	0	0	0	0	130	0
gene1338	0	0	0	0	0	167	0
gene1339	0	0	0	0	0	102	0
gene1340	0	0	0	0	0	97	0
gene1344	0	0	0	0	0	102	0
gene1345	0	0	0	0	0	91	0
gene1348	0	0	0	0	0	92	0
gene1349	0	0	0	0	0	83	0
gene135	0	0	0	0	0	161	0
gene1350	0	0	0	0	0	127	0
gene1359	0	0	0	0	0	317	0
gene1360	0	0	0	0	0	137	0
gene1362	0	0	0	0	0	64	0
gene1364	0	0	0	0	0	106	0
gene1365	0	0	0	0	0	196	0
gene1366	0	0	0	0	0	73	0
gene1367	0	0	0	0	0	104	0
gene1368	0	0	0	0	0	145	0
gene1369	0	0	0	0	0	95	0
gene1375	0	0	0	0	0	96	0
gene1378	0	0	0	0	0	104	0
gene1381	0	0	0	0	0	93	0
gene1385	0	0	0	0	0	113	0
gene1387	0	0	0	0	0	92	0
gene1388	0	0	0	0	0	245	0
gene1389	0	0	0	0	0	69	0
gene1390	0	0	0	0	0	111	0
gene1391	0	0	0	0	0	94	0
gene1395	0	0	0	0	0	91	0
gene1397	0	0	0	0	0	120	0
gene1402	0	0	0	0	0	95	0
gene1403	0	0	0	0	0	96	0
gene1404	0	0	0	0	0	77	0
gene1411	0	0	0	0	0	74	0
gene1416	0	0	0	0	0	78	0
gene1421	0	0	0	0	0	123	0
gene1423	0	0	0	0	0	102	0
gene1425	0	0	0	0	0	81	0
gene1429	0	0	0	0	0	69	0
gene1434	0	0	0	0	0	147	0
gene1436	0	0	0	0	0	71	0
gene1439	0	0	0	0	0	72	0
gene1442	0	0	0	0	0	89	0
gene1443	0	0	0	0	0	91	0
gene1444	0	0	0	0	0	67	0
gene1445	0	0	0	0	0	128	0
gene1447	0	0	0	0	0	128	0
gene1449	0	0	0	0	0	88	0
gene1450	0	0	0	0	0	84	0
gene1468	0	0	0	0	0	175	0
gene1469	0	0	0	0	0	69	0
gene1475	0	0	0	0	0	115	0
gene1476	0	0	0	0	0	131	0
gene1481	0	0	0	0	0	103	0
gene1483	0	0	0	0	0	114	0
gene1486	0	0	0	0	0	120	0
gene149	0	0	0	0	0	60	0
gene1490	0	0	0	0	0	92	0
gene1495	0	0	0	0	0	65	0
gene1497	0	0	0	0	0	127	0
gene1498	0	0	0	0	0	107	0
gene150	0	0	0	0	0	76	0
gene1500	0	0	0	0	0	69	0
gene1502	0	0	0	0	0	69	0
gene1503	0	0	0	0	0	87	0
gene1504	0	0	0	0	0	194	0
gene1505	0	0	0	0	0	98	0
gene1506	0	0	0	0	0	169	0
gene1510	0	0	0	0	0	76	0
gene1511	0	0	0	0	0	99	0
gene1512	0	0	0	0	0	136	0
gene1514	0	0	0	0	0	117	0
gene1516	0	0	0	0	0	99	0
gene1519	0	0	0	0	0	59	0
gene1520	0	0	0	0	0	159	0
gene1522	0	0	0	0	0	76	0
gene1524	0	0	0	0	0	75	0
gene1526	0	0	0	0	0	134	0
gene153	0	0	0	0	0	155	0
gene1532	0	0	0	0	0	267	0
gene1533	0	0	0	0	0	99	0
gene1534	0	0	0	0	0	66	0
gene1536	0	0	0	0	0	78	0
gene1538	0	0	0	0	0	88	0
gene1542	0	0	0	0	0	67	0
gene1545	0	0	0	0	0	109	0
gene155	0	0	0	0	0	206	0
gene1551	0	0	0	0	0	206	0
gene1552	0	0	0	0	0	93	0
gene1556	0	0	0	0	0	88	0
gene1558	0	0	0	0	0	90	0
gene156	0	0	0	0	0	244	0
gene1560	0	0	0	0	0	114	0
gene1565	0	0	0	0	0	65	0
gene1567	0	0	0	0	0	82	0
gene1568	0	0	0	0	0	103	0
gene1572	0	0	0	0	0	112	0
gene1573	0	0	0	0	0	88	0
gene1578	0	0	0	0	0	67	0
gene1579	0	0	0	0	0	72	0
gene1580	0	0	0	0	0	82	0
gene1581	0	0	0	0	0	73	0
gene1584	0	0	0	0	0	112	0
gene1585	0	0	0	0	0	92	0
gene1588	0	0	0	0	0	87	0
gene1590	0	0	0	0	0	77	0
gene1592	0	0	0	0	0	75	0
gene1593	0	0	0	0	0	74	0
gene1595	0	0	0	0	0	139	0
gene1596	0	0	0	0	0	319	0
gene1602	0	0	0	0	0	69	0
gene1603	0	0	0	0	0	67	0
gene1605	0	0	0	0	0	149	0
gene1608	0	0	0	0	0	226	0
gene1611	0	0	0	0	0	89	0
gene1613	0	0	0	0	0	65	0
gene1615	0	0	0	0	0	74	0
gene1616	0	0	0	0	0	112	0
gene1619	0	0	0	0	0	86	0
gene1620	0	0	0	0	0	60	0
gene1621	0	0	0	0	0	87	0
gene1622	0	0	0	0	0	125	0
gene1623	0	0	0	0	0	64	0
gene1626	0	0	0	0	0	89	0
gene1627	0	0	0	0	0	123	0
gene1630	0	0	0	0	0	107	0
gene1633	0	0	0	0	0	55	0
gene164	0	0	0	0	0	103	0
gene1643	0	0	0	0	0	223	0
gene1644	0	0	0	0	0	89	0
gene1645	0	0	0	0	0	94	0
gene1646	0	0	0	0	0	77	0
gene1647	0	0	0	0	0	98	0
gene1655	0	0	0	0	0	102	0
gene1656	0	0	0	0	0	79	0
gene1658	0	0	0	0	0	67	0
gene1661	0	0	0	0	0	73	0
gene1662	0	0	0	0	0	93	0
gene1665	0	0	0	0	0	140	0
gene1666	0	0	0	0	0	78	0
gene1672	0	0	0	0	0	116	0
gene1677	0	0	0	0	0	68	0
gene1679	0	0	0	0	0	66	0
gene1681	0	0	0	0	0	91	0
gene1682	0	0	0	0	0	73	0
gene1684	0	0	0	0	0	81	0
gene1686	0	0	0	0	0	224	0
gene1687	0	0	0	0	0	79	0
gene1688	0	0	0	0	0	83	0
gene1689	0	0	0	0	0	88	0
gene1693	0	0	0	0	0	105	0
gene1695	0	0	0	0	0	62	0
gene1697	0	0	0	0	0	80	0
gene1698	0	0	0	0	0	88	0
gene1700	0	0	0	0	0	68	0
gene1702	0	0	0	0	0	126	0
gene1704	0	0	0	0	0	85	0
gene1705	0	0	0	0	0	62	0
gene1707	0	0	0	0	0	116	0
gene1708	0	0	0	0	0	55	0
gene1709	0	0	0	0	0	89	0
gene1710	0	0	0	0	0	75	0
gene1711	0	0	0	0	0	160	0
gene1712	0	0	0	0	0	79	0
gene1713	0	0	0	0	0	112	0
gene1714	0	0	0	0	0	174	0
gene1715	0	0	0	0	0	263	0
gene1717	0	0	0	0	0	74	0
gene1718	0	0	0	0	0	100	0
gene173	0	0	0	0	0	211	0
gene177	0	0	0	0	0	164	0
gene18	0	0	0	0	0	353	0
gene188	0	0	0	0	0	105	0
gene190	0	0	0	0	0	176	0
gene196	0	0	0	0	0	66	0
gene197	0	0	0	0	0	152	0
gene200	0	0	0	0	0	250	0
gene205	0	0	0	0	0	173	0
gene207	0	0	0	0	0	151	0
gene208	0	0	0	0	0	107	0
gene216	0	0	0	0	0	310	0
gene219	0	0	0	0	0	112	0
gene22	0	0	0	0	0	347	0
gene220	0	0	0	0	0	112	0
gene221	0	0	0	0	0	215	0
gene224	0	0	0	0	0	115	0
gene234	0	0	0	0	0	217	0
gene242	0	0	0	0	0	83	0
gene244	0	0	0	0	0	244	0
gene245	0	0	0	0	0	170	0
gene257	0	0	0	0	0	119	0
gene26	0	0	0	0	0	209	0
gene267	0	0	0	0	0	64	0
gene276	0	0	0	0	0	148	0
gene283	0	0	0	0	0	170	0
gene288	0	0	0	0	0	171	0
gene298	0	0	0	0	0	92	0
gene299	0	0	0	0	0	109	0
gene30	0	0	0	0	0	197	0
gene301	0	0	0	0	0	105	0
gene303	0	0	0	0	0	207	0
gene304	0	0	0	0	0	218	0
gene305	0	0	0	0	0	255	0
gene307	0	0	0	0	0	69	0
gene308	0	0	0	0	0	71	0
gene313	0	0	0	0	0	138	0
gene315	0	0	0	0	0	161	0
gene322	0	0	0	0	0	77	0
gene325	0	0	0	0	0	61	0
gene329	0	0	0	0	0	72	0
gene330	0	0	0	0	0	139	0
gene331	0	0	0	0	0	141	0
gene336	0	0	0	0	0	107	0
gene341	0	0	0	0	0	67	0
gene345	0	0	0	0	0	394	0
gene350	0	0	0	0	0	83	0
gene358	0	0	0	0	0	103	0
gene359	0	0	0	0	0	506	0
gene360	0	0	0	0	0	94	0
gene368	0	0	0	0	0	58	0
gene37	0	0	0	0	0	87	0
gene385	0	0	0	0	0	287	0
gene386	0	0	0	0	0	197	0
gene390	0	0	0	0	0	267	0
gene391	0	0	0	0	0	197	0
gene4	0	0	0	0	0	464	0
gene405	0	0	0	0	0	263	0
gene414	0	0	0	0	0	219	0
gene415	0	0	0	0	0	69	0
gene416	0	0	0	0	0	84	0
gene428	0	0	0	0	0	127	0
gene429	0	0	0	0	0	175	0
gene430	0	0	0	0	0	105	0
gene436	0	0	0	0	0	190	0
gene438	0	0	0	0	0	248	0
gene439	0	0	0	0	0	117	0
gene44	0	0	0	0	0	364	0
gene441	0	0	0	0	0	76	0
gene449	0	0	0	0	0	285	0
gene460	0	0	0	0	0	135	0
gene468	0	0	0	0	0	201	0
gene469	0	0	0	0	0	143	0
gene476	0	0	0	0	0	148	0
gene477	0	0	0	0	0	151	0
gene478	0	0	0	0	0	67	0
gene479	0	0	0	0	0	171	0
gene480	0	0	0	0	0	92	0
gene481	0	0	0	0	0	544	0
gene482	0	0	0	0	0	92	0
gene489	0	0	0	0	0	115	0
gene49	0	0	0	0	0	281	0
gene490	0	0	0	0	0	138	0
gene492	0	0	0	0	0	204	0
gene498	0	0	0	0	0	145	0
gene5	0	0	0	0	0	349	0
gene50	0	0	0	0	0	219	0
gene503	0	0	0	0	0	121	0
gene505	0	0	0	0	0	221	0
gene506	0	0	0	0	0	149	0
gene508	0	0	0	0	0	83	0
gene509	0	0	0	0	0	160	0
gene51	0	0	0	0	0	302	0
gene510	0	0	0	0	0	92	0
gene516	0	0	0	0	0	103	0
gene524	0	0	0	0	0	210	0
gene527	0	0	0	0	0	185	0
gene528	0	0	0	0	0	103	0
gene530	0	0	0	0	0	122	0
gene533	0	0	0	0	0	188	0
gene535	0	0	0	0	0	118	0
gene536	0	0	0	0	0	66	0
gene537	0	0	0	0	0	94	0
gene54	0	0	0	0	0	271	0
gene542	0	0	0	0	0	134	0
gene548	0	0	0	0	0	130	0
gene550	0	0	0	0	0	191	0
gene551	0	0	0	0	0	127	0
gene556	0	0	0	0	0	84	0
gene558	0	0	0	0	0	78	0
gene559	0	0	0	0	0	121	0
gene562	0	0	0	0	0	129	0
gene568	0	0	0	0	0	58	0
gene57	0	0	0	0	0	516	0
gene572	0	0	0	0	0	218	0
gene593	0	0	0	0	0	86	0
gene603	0	0	0	0	0	100	0
gene607	0	0	0	0	0	344	0
gene610	0	0	0	0	0	148	0
gene612	0	0	0	0	0	181	0
gene614	0	0	0	0	0	178	0
gene615	0	0	0	0	0	159	0
gene623	0	0	0	0	0	205	0
gene626	0	0	0	0	0	108	0
gene627	0	0	0	0	0	285	0
gene635	0	0	0	0	0	87	0
gene636	0	0	0	0	0	160	0
gene638	0	0	0	0	0	67	0
gene644	0	0	0	0	0	109	0
gene646	0	0	0	0	0	157	0
gene649	0	0	0	0	0	86	0
gene659	0	0	0	0	0	183	0
gene662	0	0	0	0	0	130	0
gene663	0	0	0	0	0	97	0
gene671	0	0	0	0	0	164	0
gene672	0	0	0	0	0	65	0
gene673	0	0	0	0	0	193	0
gene676	0	0	0	0	0	98	0
gene677	0	0	0	0	0	135	0
gene680	0	0	0	0	0	68	0
gene689	0	0	0	0	0	325	0
gene691	0	0	0	0	0	100	0
gene694	0	0	0	0	0	82	0
gene695	0	0	0	0	0	99	0
gene697	0	0	0	0	0	70	0
gene698	0	0	0	0	0	133	0
gene701	0	0	0	0	0	145	0
gene703	0	0	0	0	0	117	0
gene708	0	0	0	0	0	98	0
gene709	0	0	0	0	0	136	0
gene710	0	0	0	0	0	76	0
gene711	0	0	0	0	0	123	0
gene712	0	0	0	0	0	144	0
gene713	0	0	0	0	0	215	0
gene715	0	0	0	0	0	78	0
gene717	0	0	0	0	0	82	0
gene720	0	0	0	0	0	118	0
gene722	0	0	0	0	0	138	0
gene725	0	0	0	0	0	82	0
gene726	0	0	0	0	0	305	0
gene727	0	0	0	0	0	183	0
gene728	0	0	0	0	0	129	0
gene729	0	0	0	0	0	185	0
gene734	0	0	0	0	0	85	0
gene736	0	0	0	0	0	173	0
gene737	0	0	0	0	0	233	0
gene739	0	0	0	0	0	168	0
gene740	0	0	0	0	0	202	0
gene741	0	0	0	0	0	129	0
gene748	0	0	0	0	0	239	0
gene750	0	0	0	0	0	151	0
gene751	0	0	0	0	0	97	0
gene753	0	0	0	0	0	200	0
gene754	0	0	0	0	0	141	0
gene757	0	0	0	0	0	263	0
gene758	0	0	0	0	0	93	0
gene764	0	0	0	0	0	123	0
gene774	0	0	0	0	0	63	0
gene777	0	0	0	0	0	155	0
gene78	0	0	0	0	0	124	0
gene784	0	0	0	0	0	187	0
gene786	0	0	0	0	0	169	0
gene789	0	0	0	0	0	219	0
gene790	0	0	0	0	0	101	0
gene791	0	0	0	0	0	253	0
gene799	0	0	0	0	0	64	0
gene80	0	0	0	0	0	178	0
gene803	0	0	0	0	0	92	0
gene804	0	0	0	0	0	135	0
gene807	0	0	0	0	0	185	0
gene809	0	0	0	0	0	129	0
gene810	0	0	0	0	0	190	0
gene812	0	0	0	0	0	98	0
gene818	0	0	0	0	0	162	0
gene823	0	0	0	0	0	95	0
gene825	0	0	0	0	0	105	0
gene83	0	0	0	0	0	368	0
gene830	0	0	0	0	0	91	0
gene833	0	0	0	0	0	174	0
gene835	0	0	0	0	0	93	0
gene838	0	0	0	0	0	71	0
gene840	0	0	0	0	0	62	0
gene846	0	0	0	0	0	212	0
gene852	0	0	0	0	0	74	0
gene854	0	0	0	0	0	80	0
gene856	0	0	0	0	0	169	0
gene858	0	0	0	0	0	104	0
gene859	0	0	0	0	0	93	0
gene86	0	0	0	0	0	167	0
gene863	0	0	0	0	0	158	0
gene874	0	0	0	0	0	94	0
gene875	0	0	0	0	0	76	0
gene876	0	0	0	0	0	76	0
gene877	0	0	0	0	0	89	0
gene878	0	0	0	0	0	103	0
gene879	0	0	0	0	0	77	0
gene881	0	0	0	0	0	113	0
gene882	0	0	0	0	0	96	0
gene885	0	0	0	0	0	136	0
gene886	0	0	0	0	0	257	0
gene891	0	0	0	0	0	166	0
gene892	0	0	0	0	0	79	0
gene894	0	0	0	0	0	134	0
gene895	0	0	0	0	0	76	0
gene897	0	0	0	0	0	103	0
gene898	0	0	0	0	0	331	0
gene903	0	0	0	0	0	157	0
gene907	0	0	0	0	0	116	0
gene909	0	0	0	0	0	64	0
gene910	0	0	0	0	0	167	0
gene911	0	0	0	0	0	157	0
gene916	0	0	0	0	0	187	0
gene920	0	0	0	0	0	113	0
gene921	0	0	0	0	0	164	0
gene922	0	0	0	0	0	119	0
gene924	0	0	0	0	0	99	0
gene925	0	0	0	0	0	88	0
gene927	0	0	0	0	0	169	0
gene930	0	0	0	0	0	74	0
gene932	0	0	0	0	0	120	0
gene934	0	0	0	0	0	86	0
gene935	0	0	0	0	0	181	0
gene937	0	0	0	0	0	82	0
gene939	0	0	0	0	0	62	0
gene94	0	0	0	0	0	238	0
gene943	0	0	0	0	0	214	0
gene946	0	0	0	0	0	77	0
gene947	0	0	0	0	0	171	0
gene948	0	0	0	0	0	185	0
gene951	0	0	0	0	0	102	0
gene966	0	0	0	0	0	113	0
gene969	0	0	0	0	0	224	0
gene970	0	0	0	0	0	154	0
gene973	0	0	0	0	0	155	0
gene976	0	0	0	0	0	71	0
gene978	0	0	0	0	0	92	0
gene98	0	0	0	0	0	142	0
gene987	0	0	0	0	0	89	0
gene99	0	0	0	0	0	172	0
gene990	0	0	0	0	0	105	0
gene991	0	0	0	0	0	191	0
gene995	0	0	0	0	0	131	0
gene996	0	0	0	0	0	149	0
gene999	0	0	0	0	0	96	0
