# Supplementary material for: The Roles of Protein Structure, Taxon Sampling, and Model Complexity in Phylogenomics: A Case Study Focused on Early Animal Divergences
Source: Preprints.org preprint supplement (doi:10.20944/preprints202101.0390.v1), 2021-01-19
Supplement: Supplementary file 5 [file XBratemat.xlsx]

## Sheet: Exposed
	Buried rate matrix
Ala	0	0.876977	1.53048	1.18934	11.9593	4.18173	3.35735	6.15017	1.66845	1.45357	2.05325	1.4323	6.5466	1.21327	6.86298	18.452	8.11924	0.550331	0.701749	12.0647
Arg	0.876977	0	1.53052	0.0768549	8.91638	5.39778	0.252917	1.01785	7.44223	1.3205	2.20687	14.1025	2.93406	0.537492	0.726306	1.69569	1.51115	2.36707	1.08137	1.02347
Asn	1.53048	1.53052	0	10.9028	7.82644	4.35743	0.728224	6.71442	16.7653	2.05503	0.661777	3.81287	2.48627	0.992662	0.495941	14.7823	7.67282	0.233905	2.75992	1.06008
Asp	1.18934	0.0768549	10.9028	0	0.85988	0.797362	12.6904	2.66785	1.99629	0.135863	0.15111	0.22725	0.227946	0.176814	0.859163	2.32841	0.978583	0.0653183	0.582164	0.416002
Cys	11.9593	8.91638	7.82644	0.85988	0	2.09608	0.260148	6.12439	11.8653	9.8157	8.50413	0.819133	9.82547	21.7579	1.23913	29.3656	9.52409	11.4129	30.3092	21.2677
Gln	4.18173	5.39778	4.35743	0.797362	2.09608	0	7.38499	1.06497	15.6094	1.38719	5.88395	5.89541	9.9258	0.247138	2.36292	3.23412	3.68523	0.307143	0.922228	2.16876
Glu	3.35735	0.252917	0.728224	12.6904	0.260148	7.38499	0	1.03582	0.940548	0.505346	0.605079	1.12906	0.924127	0.127844	0.921274	1.1141	1.41305	0.235663	0.329252	2.22597
Gly	6.15017	1.01785	6.71442	2.66785	6.12439	1.06497	1.03582	0	1.34727	0.0982778	0.235138	0.753203	0.873905	0.471306	0.658529	7.38061	0.661177	0.635425	0.315186	0.516165
His	1.66845	7.44223	16.7653	1.99629	11.8653	15.6094	0.940548	1.34727	0	1.66375	4.57003	1.53881	2.21484	11.5041	2.15673	3.31404	2.22112	2.36186	43.6988	1.54037
Ile	1.45357	1.3205	2.05503	0.135863	9.8157	1.38719	0.505346	0.0982778	1.66375	0	60.5002	1.47743	61.179	15.7718	1.20169	0.601477	13.2104	0.909174	3.89176	168.513
Leu	2.05325	2.20687	0.661777	0.15111	8.50413	5.88395	0.605079	0.235138	4.57003	60.5002	0	0.899577	70.9665	26.6992	1.96652	1.41338	2.30037	4.11869	3.64528	17.1112
Lys	1.4323	14.1025	3.81287	0.22725	0.819133	5.89541	1.12906	0.753203	1.53881	1.47743	0.899577	0	3.57602	0.119245	0.754805	1.37173	2.9278	0.124498	0.12408	1.11214
Met	6.5466	2.93406	2.48627	0.227946	9.82547	9.9258	0.924127	0.873905	2.21484	61.179	70.9665	3.57602	0	15.004	0.755891	3.18812	12.7042	5.97326	4.41235	20.0541
Phe	1.21327	0.537492	0.992662	0.176814	21.7579	0.247138	0.127844	0.471306	11.5041	15.7718	26.6992	0.119245	15.004	0	0.570867	2.77644	0.925787	30.198	195.187	6.14758
Pro	6.86298	0.726306	0.495941	0.859163	1.23913	2.36292	0.921274	0.658529	2.15673	1.20169	1.96652	0.754805	0.755891	0.570867	0	5.20083	2.31192	0.311584	0.682891	2.58133
Ser	18.452	1.69569	14.7823	2.32841	29.3656	3.23412	1.1141	7.38061	3.31404	0.601477	1.41338	1.37173	3.18812	2.77644	5.20083	0	26.2123	1.14331	1.55581	1.10434
Thr	8.11924	1.51115	7.67282	0.978583	9.52409	3.68523	1.41305	0.661177	2.22112	13.2104	2.30037	2.9278	12.7042	0.925787	2.31192	26.2123	0	0.590119	0.687529	15.612
Trp	0.550331	2.36707	0.233905	0.0653183	11.4129	0.307143	0.235663	0.635425	2.36186	0.909174	4.11869	0.124498	5.97326	30.198	0.311584	1.14331	0.590119	0	22.0867	1.00501
Tyr	0.701749	1.08137	2.75992	0.582164	30.3092	0.922228	0.329252	0.315186	43.6988	3.89176	3.64528	0.12408	4.41235	195.187	0.682891	1.55581	0.687529	22.0867	0	1
Val	12.0647	1.02347	1.06008	0.416002	21.2677	2.16876	2.22597	0.516165	1.54037	168.513	17.1112	1.11214	20.0541	6.14758	2.58133	1.10434	15.612	1.00501	1	0
	Ala	Arg	Asn	Asp	Cys	Gln	Glu	Gly	His	Ile	Leu	Lys	Met	Phe	Pro	Ser	Thr	Trp	Tyr	Val
	0.0715464	0.081291	0.0548947	0.0879276	0.00586998	0.066553	0.127786	0.0499081	0.0266166	0.0159498	0.0373272	0.132983	0.0130348	0.0112246	0.0315945	0.0804107	0.0574258	0.00373055	0.0131564	0.0307694
	max (F-Y) =	195.187		I-V	168.513		R-K	14.1025
				F-Y	195.187		D-E	12.6904
				I-M	61.179		Q-H	15.6094

## Sheet: Buried
	Buried rate matrix
Ala	0	0.623911	0.722801	1.29774	9.73331	3.06487	4.00259	14.3362	0.988329	0.276656	0.46376	1.77011	2.67756	0.337488	8.30337	33.0197	12.0894	0.14109	0.31894	8.05877
Arg	0.623911	0	5.18626	0.413429	3.32071	24.4694	1.98608	1.30391	13.3422	0.524201	0.938472	96.0626	2.04227	0.170694	1.72487	3.29461	2.99724	1.79407	0.730428	0.461906
Asn	0.722801	5.18626	0	49.6586	5.76188	17.8525	6.03135	8.16466	46.9209	1.03778	0.371125	23.2263	2.85006	0.626357	1.3461	36.7297	16.7296	0.138828	3.28435	0.722672
Asp	1.29774	0.413429	49.6586	0	0.480048	4.22697	78.7835	4.18436	6.4439	0.0444823	0.0286222	2.25881	0.243436	0.134392	1.87522	5.85804	1.40425	0.0702618	0.357402	0.137417
Cys	9.73331	3.32071	5.76188	0.480048	0	1.38189	0.103851	3.4179	2.7191	0.962477	1.47796	0.763423	2.23113	3.12469	0.7912	22.8535	7.38938	1.52383	3.96666	5.86427
Gln	3.06487	24.4694	17.8525	4.22697	1.38189	0	54.6856	1.62096	47.7916	0.513774	4.52506	44.9173	13.0373	0.320884	6.56401	8.54223	7.63014	0.773564	1.29653	1.59346
Glu	4.00259	1.98608	6.03135	78.7835	0.103851	54.6856	0	2.54266	3.26426	0.33315	0.354494	16.3613	1.63699	0.159922	2.80968	4.07127	4.72839	0.267574	0.359732	1.92719
Gly	14.3362	1.30391	8.16466	4.18436	3.4179	1.62096	2.54266	0	0.406969	0.0189213	0.0416352	2.16132	0.273174	0.113272	0.853999	12.2241	0.481532	0.302735	0.0369877	0.180723
His	0.988329	13.3422	46.9209	6.4439	2.7191	47.7916	3.26426	0.406969	0	0.418245	1.93315	6.39686	1.8259	4.19732	3.18869	5.61504	2.88994	1.71535	34.8855	0.500559
Ile	0.276656	0.524201	1.03778	0.0444823	0.962477	0.513774	0.33315	0.0189213	0.418245	0	14.4946	1.17029	21.601	2.88611	0.343108	0.237932	5.26946	0.208359	0.327829	49.6565
Leu	0.46376	0.938472	0.371125	0.0286222	1.47796	4.52506	0.354494	0.0416352	1.93315	14.4946	0	1.04386	29.3058	6.82867	0.808641	0.410963	1.15855	0.821742	0.83322	5.43071
Lys	1.77011	96.0626	23.2263	2.25881	0.763423	44.9173	16.3613	2.16132	6.39686	1.17029	1.04386	0	6.99892	0.194898	2.3631	5.49653	10.8882	0.49687	0.783208	1.38135
Met	2.67756	2.04227	2.85006	0.243436	2.23113	13.0373	1.63699	0.273174	1.8259	21.601	29.3058	6.99892	0	5.97447	0.633634	2.2369	11.8254	1.55238	1.00033	8.45672
Phe	0.337488	0.170694	0.626357	0.134392	3.12469	0.320884	0.159922	0.113272	4.19732	2.88611	6.82867	0.194898	5.97447	0	0.339286	0.888815	0.479986	5.29438	44.5051	1.29087
Pro	8.30337	1.72487	1.3461	1.87522	0.7912	6.56401	2.80968	0.853999	3.18869	0.343108	0.808641	2.3631	0.633634	0.339286	0	9.00212	4.01852	0.148873	0.240402	1.43093
Ser	33.0197	3.29461	36.7297	5.85804	22.8535	8.54223	4.07127	12.2241	5.61504	0.237932	0.410963	5.49653	2.2369	0.888815	9.00212	0	47.4217	0.738797	1.33837	0.486735
Thr	12.0894	2.99724	16.7296	1.40425	7.38938	7.63014	4.72839	0.481532	2.88994	5.26946	1.15855	10.8882	11.8254	0.479986	4.01852	47.4217	0	0.343786	0.730138	10.4505
Trp	0.14109	1.79407	0.138828	0.0702618	1.52383	0.773564	0.267574	0.302735	1.71535	0.208359	0.821742	0.49687	1.55238	5.29438	0.148873	0.738797	0.343786	0	5.97589	0.187155
Tyr	0.31894	0.730428	3.28435	0.357402	3.96666	1.29653	0.359732	0.0369877	34.8855	0.327829	0.83322	0.783208	1.00033	44.5051	0.240402	1.33837	0.730138	5.97589	0	1
Val	8.05877	0.461906	0.722672	0.137417	5.86427	1.59346	1.92719	0.180723	0.500559	49.6565	5.43071	1.38135	8.45672	1.29087	1.43093	0.486735	10.4505	0.187155	1	0
	Ala	Arg	Asn	Asp	Cys	Gln	Glu	Gly	His	Ile	Leu	Lys	Met	Phe	Pro	Ser	Thr	Trp	Tyr	Val
	0.0947401	0.0301394	0.0199622	0.0198491	0.0331112	0.0198463	0.020194	0.0476772	0.0221562	0.0898902	0.179189	0.0192109	0.034013	0.0693452	0.0183803	0.05659	0.0475999	0.0176386	0.0459767	0.114491
	max (R-K) =	96.0626		I-V	49.6565		R-K	96.0626
				F-Y	44.5051		D-E	78.7835
				I-M	21.601		Q-H	47.7916
